# Supplementary material for: Acentric chromosome ends are prone to fusion with functional chromosome ends through a homology-directed rearrangement
Source: PubMed Central journal article supplement — Nucleic Acids Res. 2015 Oct 3;44(1):232–44. doi: 10.1093/nar/gkv997 (PMC4705696; doi:10.1093/nar/gkv997), 2015-10-03
Supplement: supp_gkv997_Supplementary_data_RRR.pdf [file supp_gkv997_Supplementary_data_RRR.pdf]

## SUPPLEMENTARY DATA

### **Acentric chromosome ends are prone to fusion with functional chromosome ends through a homology-directed rearrangement**

Yuko Ohno<sup>1</sup>, Yuki Ogiyama<sup>1,†</sup>, Yoshino Kubota<sup>1</sup>, Takuya Kubo<sup>2</sup> and Kojiro Ishii<sup>1,3,\*</sup>

<sup>1</sup> Graduate School of Frontier Biosciences, Osaka University, Suita, Osaka 565-0871, Japan

<sup>2</sup> Graduate School of Environmental Science, Hokkaido University, Sapporo, Hokkaido 060-0810, Japan

<sup>3</sup> Institute for Academic Initiatives, Osaka University, Suita, Osaka 565-0871, Japan

\* To whom correspondence should be addressed. Tel.: +81 6 6879 4660; Fax: +81 6 6879 4660;  
Email: [ishii@fbs.osaka-u.ac.jp](mailto:ishii@fbs.osaka-u.ac.jp)

† Present address: Institute of Human Genetics, CNRS UPR 1142, 34396 Montpellier, France

## Supplementary Methods

### Bayesian estimation of strain-dependent effects on survivor emergence

To evaluate the joint probability of telomere-fusion survivor emergence at the  $\Delta cen1$  screens in wild-type and mutant strain backgrounds, we developed a Bayesian generalised linear mixed model that allowed us to estimate the posterior distributions of strain-dependent effects on survivor emergence as random effects by fitting to the experimental data. Because the random effect parameter for each screen is estimated based on a subset of all of the data, by definition, hierarchical Bayesian modelling can provide a better inference by choosing a variance parameter that refers to the dispersion of whole strains. Here,  $p(X, Y, Z)$  was used as a general notation for the joint probability, where  $X$ ,  $Y$  and  $Z$  represent the telomere-fusion, removal of  $cen1$ -reintegrated false-positive survivors, and initial drug resistant-survivor emergence, respectively (40). The  $p(X, Y, Z)$  notation can be decomposed into three probabilities, i.e.,  $p(X, Y, Z) = p(X | Y, Z) p(Y | Z) p(Z)$ , where the  $p(A | B)$  notation refers to the conditional probability that event  $A$  occurs under the condition that event  $B$  occurs. All of these decomposed probabilities,  $p(X | Y, Z)$ ,  $p(Y | Z)$ , and  $p(Z)$ , were estimated using a common framework for Bayesian logistic regression, of which the linear predictor was the sum of the intercepts, replicates, and strain-dependent effects. Hierarchical prior distributions were specified for the effects of replicates and strains as the Gaussian distribution around mean zero, whereas the intercepts were non-hierarchical priors and the variances were non-informative priors. The relative effect of each strain was evaluated as the difference in log odds of  $p(X, Y, Z)$  between mutant and wild-type posteriors.

The posterior distributions of all parameters in the Bayesian statistical model were estimated using the Monte Carlo Markov chain (MCMC) method. Sampling from the marginal posterior distributions was performed using the Gibbs sampling software JAGS 3.4.0 (<http://mcmc-jags.sourceforge.net/>). The posterior samples were obtained by three independent chains in which 1000 values were sampled with a 5-step interval after 1000 burn-in MCMC steps. The convergences of the MCMC samples were confirmed such that all R-hat indexes for all parameters were close to unity. All statistical significances were checked by evaluating the 95% BCIs of the posterior distributions. The JAGS and R codes that are common for estimation of the probabilities of telomere-fusion,  $cen1$  reintegration, and initial survivor emergence are shown below.

```
# BUGS code
for (i in 1:N.sample) {
  Y[i] ~ dbin(p[i], N[i])
  logit(p[i]) <- logit.p[i]
}
for (i in 1:N.sample) {
  logit.p[i] ~ dnorm(m[i], tau[1])
  m[i] <- alpha + beta[Group[i]]
}
alpha ~ dnorm(0, 1.0E-4)
for (j in 1:N.group) {
  beta[j] ~ dnorm(0, tau[2])
}
for (k in 1:N.tau) {
  tau[k] <- 1.0 / (s[k] * s[k])
}
```

```
        s[k] ~ dunif(0, 1.0E+4)
    }
```

```
# R code
```

```
library(rjags)
```

```
N.sample <- nrow(d)
```

```
N.group <- length(levels(d$group))
```

```
list.data <- list(
```

```
  N.sample = N.sample,
```

```
  N.group = N.group,
```

```
  N.tau = 2,
```

```
  Y = d$y,
```

```
  N = d$N,
```

```
  Group = d$group_id
```

```
)
```

```
inits <- list( # parameter initial values
```

```
  alpha = 0,
```

```
  beta = rnorm(N.group, 0, 0.1),
```

```
  s = c(1, 1)
```

```
)
```

```
n.burnin <- 1000
```

```
n.chain <- 3
```

```
n.thin <- 5
```

```
n.iter <- n.thin * 1000
```

```
model <- jags.model(
```

```
  file = "model.bug",
```

```
  data = list.data,
```

```
  inits = inits,
```

```
  n.chain = 3 # !!!
```

```
)
```

```
update(model, n.burnin) # burn in
```

```
post.mcmc.list <- coda.samples(
```

```
  model,
```

```
  c("alpha", "beta", "s"),
```

```
  thin = n.thin, n.iter = n.iter
```

```
)
```

Supplementary Table S1. Yeast strain list

| Strain name | Genotype                                                                                                                                        |
|-------------|-------------------------------------------------------------------------------------------------------------------------------------------------|
| KYP33       | <i>h<sup>-</sup> leu1 ura4</i>                                                                                                                  |
| KYP378      | <i>h<sup>-</sup> leu1 ura4 cen1L::P<sup>adh1</sup> -loxP cen1R::ura4<sup>+</sup> -loxP-kanR<sup>ORF</sup></i>                                   |
| KYP810      | <i>h<sup>-</sup> leu1 ura4 Δcen1::P<sup>adh1</sup> -loxP-kanR cd1-31 (1R;2L fusion)</i>                                                         |
| KYP812      | <i>h<sup>-</sup> leu1 ura4 Δcen1::P<sup>adh1</sup> -loxP-kanR cd1-33 (1L;3R fusion)</i>                                                         |
| KYP815      | <i>h<sup>-</sup> leu1 ura4 Δcen1::P<sup>adh1</sup> -loxP-kanR cd1-36 (1L;2R fusion)</i>                                                         |
| KYP821      | <i>h<sup>-</sup> leu1 ura4 Δcen1::P<sup>adh1</sup> -loxP-kanR cd1-42 (1L;2R fusion)</i>                                                         |
| KYP826      | <i>h<sup>-</sup> leu1 ura4 Δcen1::P<sup>adh1</sup> -loxP-kanR cd1-47 (1L;2L fusion)</i>                                                         |
| KYP828      | <i>h<sup>-</sup> leu1 ura4 Δcen1::P<sup>adh1</sup> -loxP-kanR cd1-49 (1L;3R fusion)</i>                                                         |
| KYP830      | <i>h<sup>-</sup> leu1 ura4 Δcen1::P<sup>adh1</sup> -loxP-kanR cd1-51 (1R;2R fusion)</i>                                                         |
| KYP832      | <i>h<sup>-</sup> leu1 ura4 Δcen1::P<sup>adh1</sup> -loxP-kanR cd1-53 (1R;3L fusion)</i>                                                         |
| KYP838      | <i>h<sup>-</sup> leu1 ura4 Δcen1::P<sup>adh1</sup> -loxP-kanR cd1-59 (1L;2R fusion)</i>                                                         |
| KYP386      | <i>h<sup>-</sup> leu1 ura4 Δcen1::P<sup>adh1</sup> -loxP-kanR cd1-63 (1R;3L fusion)</i>                                                         |
| KYP387      | <i>h<sup>-</sup> leu1 ura4 Δcen1::P<sup>adh1</sup> -loxP-kanR cd1-64 (1R;2R fusion)</i>                                                         |
| KYP388      | <i>h<sup>-</sup> leu1 ura4 Δcen1::P<sup>adh1</sup> -loxP-kanR cd1-65 (1L;2R fusion)</i>                                                         |
| KYP1272     | <i>h<sup>-</sup> leu1 ura4 Δcen1::P<sup>adh1</sup> -loxP-kanR cd1-73 (1L;2L fusion)</i>                                                         |
| KYP1273     | <i>h<sup>-</sup> leu1 ura4 Δcen1::P<sup>adh1</sup> -loxP-kanR cd1-77 (1R;2R fusion)</i>                                                         |
| KYP4478     | <i>h<sup>-</sup> leu1 ura4 Δcen1::P<sup>adh1</sup> -loxP-kanR cd1-96 (1R;2R fusion)</i>                                                         |
| KYP4479     | <i>h<sup>-</sup> leu1 ura4 Δcen1::P<sup>adh1</sup> -loxP-kanR cd1-97 (1L;2L fusion)</i>                                                         |
| KYP4480     | <i>h<sup>-</sup> leu1 ura4 Δcen1::P<sup>adh1</sup> -loxP-kanR cd1-98 (1L;2L fusion)</i>                                                         |
| KYP4481     | <i>h<sup>-</sup> leu1 ura4 Δcen1::P<sup>adh1</sup> -loxP-kanR cd1-99 (1R;2L fusion)</i>                                                         |
| KYP4482     | <i>h<sup>-</sup> leu1 ura4 Δcen1::P<sup>adh1</sup> -loxP-kanR cd1-100 (1R;2R fusion)</i>                                                        |
| KYP3948     | <i>h<sup>-</sup> leu1 ura4 cen1L::P<sup>adh1</sup> -loxP cen1R::ura4<sup>+</sup> -loxP-kanR<sup>ORF</sup> rad52-GFP::nat taz1-mCherry::kanR</i> |
| KYP2481     | <i>h<sup>-</sup> leu1 ura4 cen1L::P<sup>adh1</sup> -loxP cen1R::ura4<sup>+</sup> -loxP-kanR<sup>ORF</sup> Δpku70::hph</i>                       |
| KYP2428     | <i>h<sup>-</sup> leu1 ura4 cen1L::P<sup>adh1</sup> -loxP cen1R::ura4<sup>+</sup> -loxP-kanR<sup>ORF</sup> Δlig4::hph</i>                        |
| KYP3949     | <i>h<sup>-</sup> leu1 ura4 cen1L::P<sup>adh1</sup> -loxP cen1R::ura4<sup>+</sup> -loxP-kanR<sup>ORF</sup> Δrad16::nat</i>                       |
| KYP2339     | <i>h<sup>-</sup> leu1 ura4 cen1L::P<sup>adh1</sup> -loxP cen1R::ura4<sup>+</sup> -loxP-kanR<sup>ORF</sup> Δswi10::hph</i>                       |
| KYP674      | <i>h<sup>-</sup> leu1 ura4 cen1L::P<sup>adh1</sup> -loxP cen1R::ura4<sup>+</sup> -loxP-kanR<sup>ORF</sup> Δaz1::hph</i>                         |
| KYP2428     | <i>h<sup>-</sup> smt-0 leu1 ura4 cen1L::P<sup>adh1</sup> -loxP cen1R::ura4<sup>+</sup> -loxP-kanR<sup>ORF</sup> Δrad51::hph</i>                 |
| KYP2429     | <i>h<sup>-</sup> smt-0 leu1 ura4 cen1L::P<sup>adh1</sup> -loxP cen1R::ura4<sup>+</sup> -loxP-kanR<sup>ORF</sup> Δrad52::hph</i>                 |
| KYP2554     | <i>h<sup>-</sup> smt-0 leu1 ura4 cen1L::P<sup>adh1</sup> -loxP cen1R::ura4<sup>+</sup> -loxP-kanR<sup>ORF</sup> Δrad55::hph Δrad57::nat</i>     |
| KYP2131     | <i>h<sup>-</sup> leu1 ura4 cen3L::P<sup>adh1</sup> -loxP cen3R::ura4<sup>+</sup> -loxP-kanR<sup>ORF</sup></i>                                   |
| KYP4885     | <i>h<sup>-</sup> leu1 ura4 cen3L::P<sup>adh1</sup> -loxP cen3R::ura4<sup>+</sup> -loxP-kanR<sup>ORF</sup> SAS(3L)::LEU2</i>                     |
| KYP4889     | <i>h<sup>-</sup> leu1 ura4 cen3L::P<sup>adh1</sup> -loxP cen3R::ura4<sup>+</sup> -loxP-kanR<sup>ORF</sup> SAS(3R)::LEU2</i>                     |
| KYP4890     | <i>h<sup>-</sup> leu1 ura4 cen3L::P<sup>adh1</sup> -loxP cen3R::ura4<sup>+</sup> -loxP-kanR<sup>ORF</sup> SAS(3L)::LEU2 SAS(3R)::LEU2</i>       |
| KYP811      | <i>h<sup>-</sup> leu1 ura4 Δcen1::P<sup>adh1</sup> -loxP-kanR cd1-32</i>                                                                        |
| KYP814      | <i>h<sup>-</sup> leu1 ura4 Δcen1::P<sup>adh1</sup> -loxP-kanR cd1-35</i>                                                                        |
| KYP816      | <i>h<sup>-</sup> leu1 ura4 Δcen1::P<sup>adh1</sup> -loxP-kanR cd1-37</i>                                                                        |
| KYP817      | <i>h<sup>-</sup> leu1 ura4 Δcen1::P<sup>adh1</sup> -loxP-kanR cd1-38</i>                                                                        |
| KYP818      | <i>h<sup>-</sup> leu1 ura4 Δcen1::P<sup>adh1</sup> -loxP-kanR cd1-39</i>                                                                        |
| KYP819      | <i>h<sup>-</sup> leu1 ura4 Δcen1::P<sup>adh1</sup> -loxP-kanR cd1-40</i>                                                                        |
| KYP820      | <i>h<sup>-</sup> leu1 ura4 Δcen1::P<sup>adh1</sup> -loxP-kanR cd1-41</i>                                                                        |
| KYP822      | <i>h<sup>-</sup> leu1 ura4 Δcen1::P<sup>adh1</sup> -loxP-kanR cd1-43</i>                                                                        |
| KYP823      | <i>h<sup>-</sup> leu1 ura4 Δcen1::P<sup>adh1</sup> -loxP-kanR cd1-44</i>                                                                        |
| KYP824      | <i>h<sup>-</sup> leu1 ura4 Δcen1::P<sup>adh1</sup> -loxP-kanR cd1-45</i>                                                                        |
| KYP825      | <i>h<sup>-</sup> leu1 ura4 Δcen1::P<sup>adh1</sup> -loxP-kanR cd1-46</i>                                                                        |
| KYP827      | <i>h<sup>-</sup> leu1 ura4 Δcen1::P<sup>adh1</sup> -loxP-kanR cd1-48</i>                                                                        |
| KYP829      | <i>h<sup>-</sup> leu1 ura4 Δcen1::P<sup>adh1</sup> -loxP-kanR cd1-50</i>                                                                        |

Supplementary Table S2. Oligonucleotide list

| caPCR primers                                   |                                                 |
|-------------------------------------------------|-------------------------------------------------|
| 7926                                            | 5'-GGGTTGCAAAGTATGATTGTGGTAA-3'                 |
| 14206                                           | 5'-GCATAAAGATGGTACTTCAA-3'                      |
| 31268                                           | 5'-TGTTGAATGTCAGAACCAACTGTTGCAT-3'              |
| Asp(1L)                                         | 5'-TCCGTACGCAATTATTCGCA-3'                      |
| Asp(2L)                                         | 5'-TAACGGTTGCGTTTTCTTCC-3'                      |
| TAS1_TAIL-II                                    | 5'-GGTGAAATTCACTAAGTGTAATACAGTAGTGCAAGT-3'      |
| TAS3_TAS2-F1                                    | 5'-GGAGTAAGTAGTGAGTCAG-3'                       |
| TAS1_TAS2-F1                                    | 5'-TTAAACGATTTTTGGAGAGAG-3'                     |
| subtelrD-R4                                     | 5'-CCTCTAAGCCAGAATCCG-3'                        |
| 60241                                           | 5'-TTGAAGTACCATCTTTATGC-3'                      |
| c-rDNA-t                                        | 5'-GAAGTTTGTCAATGGAAGGG-3'                      |
| SAS-Rv1                                         | 5'-CGGGATCCGCGGCCGCAGGCTGGCTACTGTTTTAC-3'       |
| TAS1-Rv1                                        | 5'-CGGGATCCGCGGCCGCACCACGTAACCTTGTAACC-3'       |
| TAS2 ligation-independent cloning (LIC) primers |                                                 |
| TAS2cen-infusion-KS-R                           | 5'-TTAACCATTCCACGATGCATTTGATATCGAATTCCTGCAGC-3' |
| TAS2tel-infusion-KS-F                           | 5'-TATTGGAAAGTCAGATGCATGCTTATCGATACCGTCGAC-3'   |
| qPCR primers                                    |                                                 |
| act1-56F                                        | 5'- ATCCAACCGTGAGAAGATGACT-3'                   |
| act1-56R                                        | 5'- AAACAGCTTGAATAGCAACATAAAAAG-3'              |
| STE2-1F                                         | 5'- GGAGAACAAAGAAGTAAGTAAAGTAAGAAA-3'           |
| STE2-98R                                        | 5'- AAAGTACACCGCATGTTTCCTATTAT-3'               |
| Telomere probe                                  |                                                 |
| tel                                             | 5'-CGTGTAACCACGTAACCTTGTAACCCGATC-3'            |

**A**

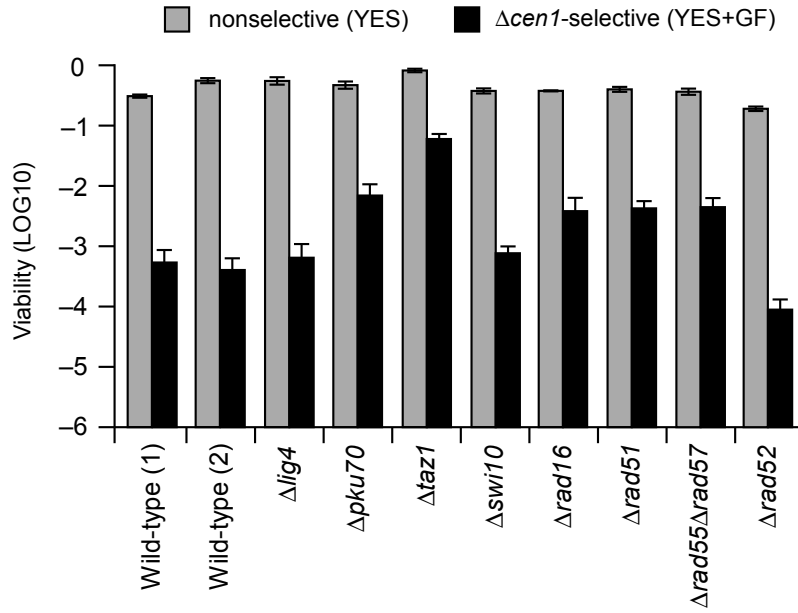

**B**

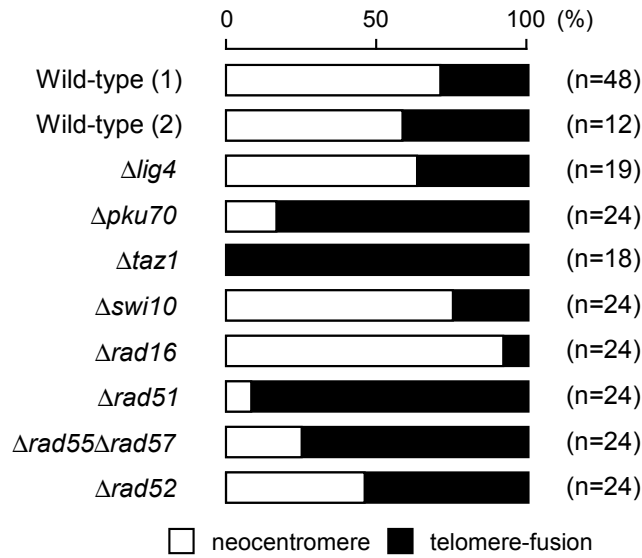

**C**

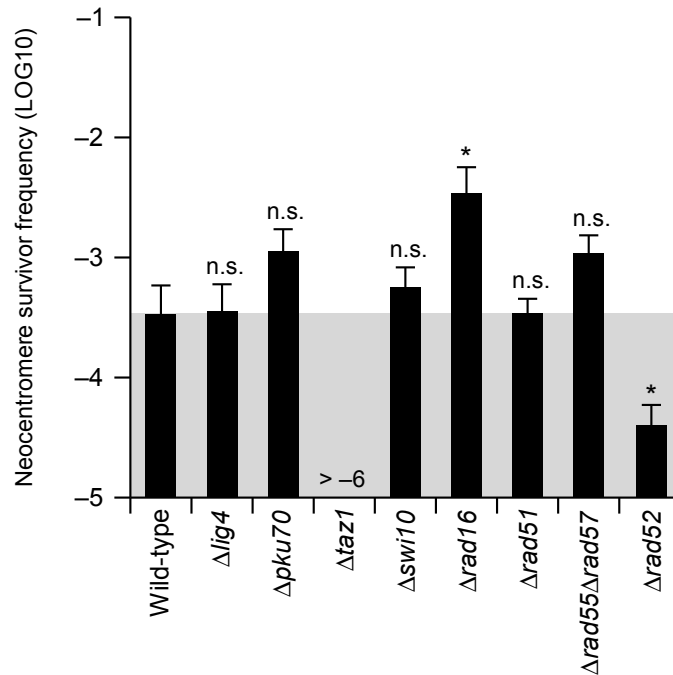

Supplementary Figure S1. Profile of the centromere deletion screen and characterisation of the resulting survivors. (A) The viabilities of total cells (grey) and *cen1*-deleted cells (black), as determined by their colony formation frequency on nonselective YES plates and  $\Delta cen1$ -selective G418- and 5-fluoroorotic acid-containing YES (YES+GF) plates. Data are represented as the mean  $\pm$  SEMs of  $n = 6$  replicates performed simultaneously. (B) The ratios of neocentromere formation and telomere-fusion in the survivors obtained in each screen. The sample size ( $n$ ) varied depending on the frequency of telomere-fusion events. (C) The frequencies of neocentromere survivor generation upon *cen1* deletion in the indicated mutant backgrounds. Data are represented as the mean  $\pm$  SEM of  $n = 6$  replicates. \*, the 95% BCI does not include zero; n.s., the 95% BCI includes zero (not significant).

**A**

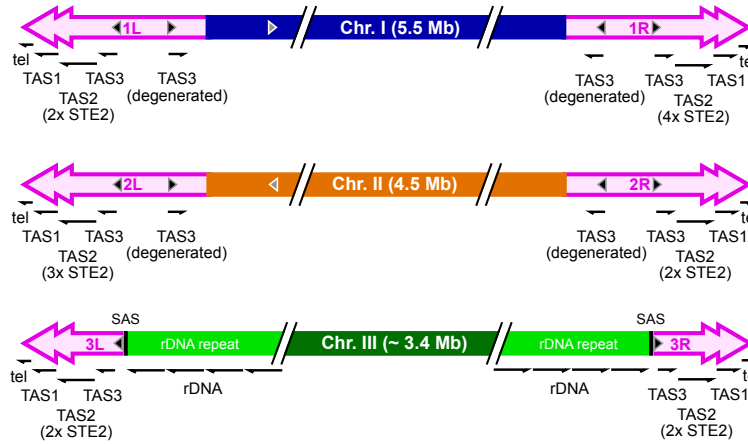

**B**

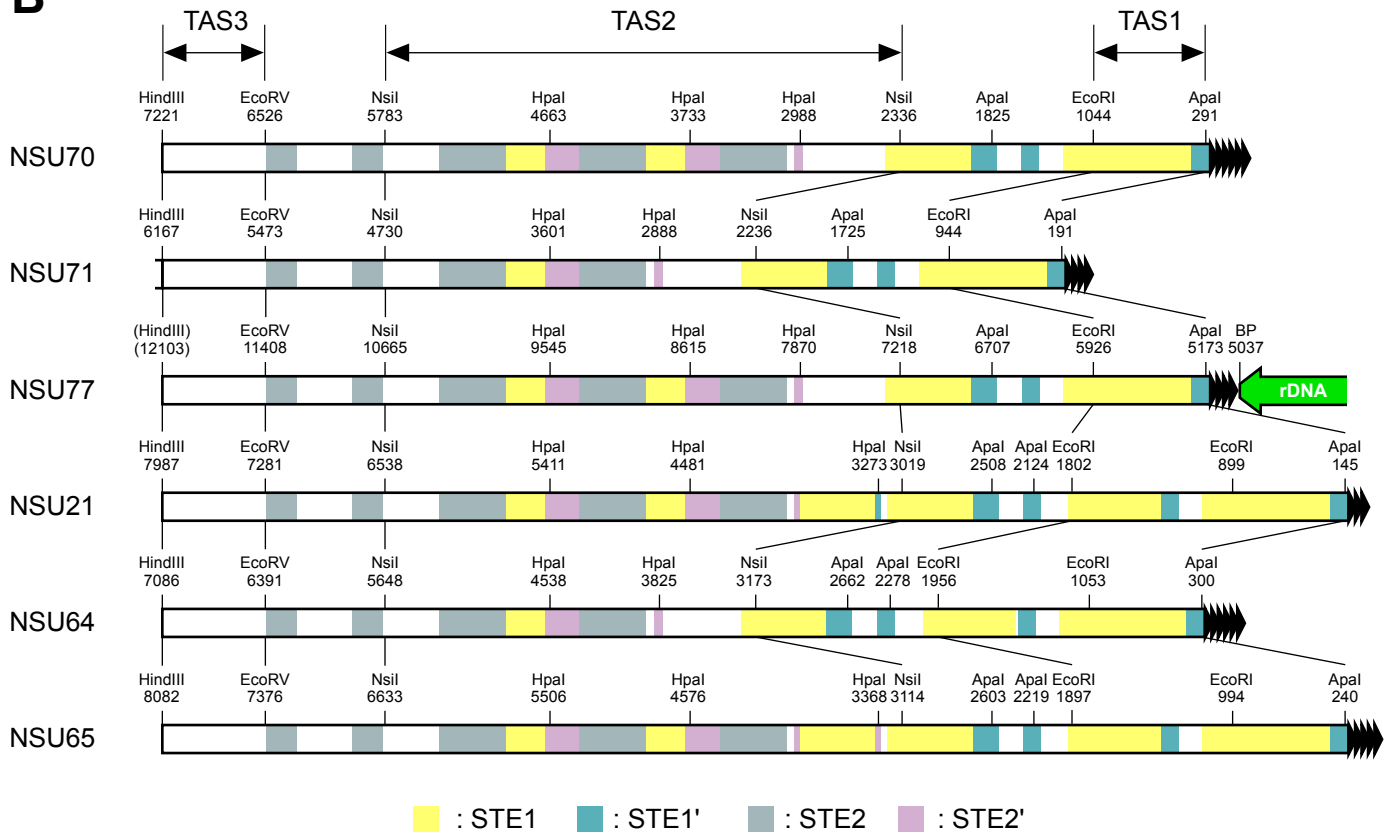

**C**

STE1 (NSU70)

```

4943 GTAGTGTAGTGTGGTAGTGAAGATGGACAAAACAC ---- TGAATGAGTG-GAAGT-GAGTGTGTTGGGATGCAGTAAGTATAATAAGGGGAT 4857
4856 GTAGTGTGCATGAGTGAATAAAACGGATGAAAAA ---- TTTGAAGTTGATTTGAATT-GAGTGTGCTGGAGTACGTTAAAGGTGATAGGGGACAA 4768
4767 GTAGTGTACTATAATAATTAGGATGGTTAAAAAATA ---- TGAAGTTGACTCAGTTTTGATTGATTGAGTGGGT----- 4701
4017 GTAGTGTAGTGTGGTAGTGAAGATGGACAAAACAC ---- TGAATGAGTG-GAAGT-GAGTGTGTTGGGATGCAGTAAGTATAATAAGGGGAT 3931
3930 GTAGTGCATAATGGCGAATGAGGATAGATGAATGAAACTTGAAGTTTATAGAATAA-GGCTGTGTTGTAATGCAGTAAAGTTGAATAAAGATAC 3838
3837 GCAGTGTATTATGATAATCAAGATGGATGAAAAAATA ---- TGAAGTTGACTCAGTTTTGATTGATTGAGTGGGT----- 3771
2429 GTAGGAGAAT-----GAAGAAGTAAATCAAA-----GTAAGAGAGTATTAGA-----AAGTAAAGTAAA-TAAGGATGGATAC 2364
2363 ATAGTGTATATTGGAAAGTCAGATGCATAAAAAA ---- TTTGAAGTTGGTATGTATT-GAGTGTGTTGGAGTACGGTAA----- 2290
2289 GTAT--AATAGGGGTAATAAAATGGGTAAAAAATA ---- TTTGAAGTTGATTTGAATT-GGAAGTTGAGTATGTTGGAGTACATTAAAGTATAATACGGTGT 2200
2199 GGAGCGTACTATGGTAAATGAAATGAATGAAGAAAAA ---- TGAAGTTGGGTTGAATT-GAGCGTGGTAGGATTCATTATGTATGATTAGGAGAT 2111
2110 ATAATGAGATATGGTGAATAAAAGTTGAAA ---- TGT-GTGGGCTTGA-GT-GCGTTAGGGTGCAGTAAAGTAAAGTAAAGGGGC---- 2033
2032 GCAGTGTATTATGATAATAAAAATGGATGAAAAA ---- TTTGAAGTTCACT----- 1986
1176 -----GAGTAAAAGAAAA ---- GAAGATGAAT-GGATTAAGTGTGGAGTAGATTAAAGTAAAGTAAAGGAT 1112
1111 GTAGGGTAGTGCAATAGTGAAGATGGACAAAAG ---- TTTGAAGTTCACTG-GAATTAGACTATGTTGGAATCACTAATTGTAATAAGGTGGT 1024
1023 GTAGTGTGATGGGTGAATAAAACGGATGAAAAA ---- TTTGAAGTTGATTTGAATT-GAGTGTGTTAAAGTTCACTAAAGTATAATACGGTGT 935
934 GTAGTGTACTATAGTATTTAGGATGGGTAAAAA ---- TTTGAAGTTGTTG-GAATT-GAGTGTGCTGGAGTACGTTAAGTATAATACGGTGTAG 848
847 GTAGTGTACTATAATAATTAGGATGGTTAAAAA ---- TTTGAAGTTGTTG-GAATT-GAGTGTGTTAGAGTTCATTAAAGTATAATACGGTGTAG 760
759 GTAGTGTACTATAGTATTTAGGATAGGTAAAAA ---- TTTGAAGTTGTTG-GAATT-GAGTGTGTTAGAGTTCATTAAAGTATAATACGGTGTAG 672
671 GTAGTGTACTATAGTATTTAGGATGGG-AAAAA ---- TTTGAAGTTGTTG-GAATT-GAGTGTGTTAGAGTTCATTAAAGTATAATACGGTGTAG 585
584 GTAGTGTACTATAGTATTTAGGATGGG-AAAAA ---- TTTGAAGTTGTTG-GAATT-GAGTGTGTTAGAGTTCATTAAAGTATAATACGGTGTAG 499
498 GCAGTGTATTATGATAATAAAAATGGATGAAAAA ---- TTTGAAGTTCACT----- 452
    
```







Supplementary Figure S2

ATTTGAAGTTGACTCAGTCATGGTAGCTGGATAACGAAGTAACAATATGGAATAAGGAAATGAAGGAGAGAATATAAGAGTAGGATATATAGAAGAGA  
GTAGAAATCAAAAAAATAAGTAAGGAGAG  
TAAATTAATATTTAAAAACGAAATAAATAAAAAATAAAATAAATAAATAAATAAATAAATAAATAAATAAATAAATAAATAAATAAATAAATAA  
GTAGGAGAAT-----GAAGAAGTAAATCAAA-----GTAAAGAGATATTAGA-----AAGTAAAGTAAA-TAAGGATGGATAC  
ATAGTGTATATTTGGAAAGTCAGATGCGATAAAAA-----TTTGAAGTTGGTATGTATT-GAGTGTGTTGGAGTACGGTAA-----  
GTAT--AATAGGGGTAAATAAAATGGGTAAAAA-----TTTGAATGTGT-GGAAGTTGAGTATGTTGGAGTACATTAAGTAGATTACAGTTGT  
GGAGCGTACTATGGTAATGAAATGAATGAAGAAA-----TGAAGTTGGGTGAAT-GAGCGTGGTAGGATTCATTATGTATGATTAGGAGAT  
ATAATGAGATATGGTGAATAAAAAG-TTGA-----TGT-GTGGCTTGA-GT-GCGTTAGGGTGCAGTAAAGTAGAATAAAGGGG-----  
GCAGTGTATTATGATAATTAATGGATGAAAA-----TTTGAAGTTCACT-----  
CAGTCATAATTAATTTGGTAAACGGAGTAAACAATATAGAATAAAGGGAATTTAGGAAGTGCAGTAAAGTTGAATAAAGAAAATAGAAAATGAAATACGGTATT  
CATAAAAAAATAAATTTACTTAAAGTTTTTTTTTCCACAATAC--AATGCCCCACTA-TT-----CACCCGTCAGCCGAGCCGTACGGCGAGTATTCGT  
TAAACGATTTT  
GGAGAGAGAGAATGGATAATGGATGGAGGTAAGAGAGGTATGAAAGAGTAGAAGATATAGAAGAGAAGAGAAGAAAATGAGGAAGAAGTAAAGTAAT  
AGAATAAGAGAAACAGAGTAAGGAGAGTAAATAAATAAAGTAAAGAGATAAAGAAAATAAGTAAAGTAAAGGAAAGAAAATAGAAAACAGAGGACTATA  
TTGGAGTAGATTAAGTAGATTACAGTTTGTGCAGCGT-----AGTATGATAATGAAGATAAAGAAAAGATAAATTAAGCTGCGTTATT  
TATAAAAAATTTAAATTTACTTAAAG-TTTTTTTCACATATAC--AATGCCCCACTACTGGACCCCAACCCGTCAGCCGAGCCGTAAGGCGAGTATTCGT  
TAAACGTTTTT  
AGAGAGAGAGAAGGAAATGAAGGAGAGAAGGAAATGAAGGAGAGAAGGAAATGAAGGAGGAGAATAGGTAGAGTAGGTAAGTAGGTAAGTAGGTAAGG  
TAGAGAGTAGGTAGGATAGAGATGGAAGAAAGAGGAAAGGAAAGTAAATGGAATAGAATAAATAAGAAATAGAATAAATAAGAAATAAGAAATA  
ATAGAATAAATAAATAAATAA  
-----GAGTAAAAAGAAA-----GAAGATGAAT-GGATTAAGAGTGTGGAGTAGATTAAGTAGAATACGAGGAT  
GTAGGGTAGTGCAATAGTGAAGATGGACAAAAG-----TTGAAGTTCATG-GAATTAGACTATGTTGGAATTCACTAATTGTAATAAGGTGGT  
GTAGTGTGTATGGGTGAATAAAACGGATGAAAA-----TTTGAAGTTGATTGAAC-TAGTGTGTTAAAGTTTCAATTAAGTATAATACGGTGT  
GTAGTGTACTATAGTATTTAGGATGGGTAAAAA-----TTGAAATGTGT-GAATT-GAGTGTGCTGGAGTACGTTAAGTATAATACGGTGA  
GTAGTGTACTATAAATAATAGGATGGTAAAAA-----TTTGAAGTTGAT-GAATT-GAGTGTGTTAGAGTTCATTAAAGTATAATACGGTGA  
GTAGTGTACTATAGTATTTAGGATAGGTAAAAA-----TTTGAAGTTGAT-GAATT-GAGTGTGTTAGAGTTCATTAAAGTATAATACGGTGA  
GTAGTGTACTATAGTATTTAGGATGGG-AAAAA-----TTGAAATGTGT-GAATT-GAGTGTGTTAGAGTTCATTAAAGTATAATACGGTGA  
GTAGTGTACTATAGTATTTAGGATGGG-AAAAA-----TTGAAATGTGT-GAATT-GAGTGTGTTAGAGTTCATTAAAGTATAATACAGTGT  
GCAGTGTATTATGATAATTAATGGATGAAAA-----TTTGAAGTTCACT-----  
CAGTCATAATTAATTTGGTAAACGGAGTAAACAATATAGAATAAAGGGAATTTAGGAAGTGCAGTAAAGTTGAATAAAGAAAATAGAAAATGAAATACGGTATT  
CATAAAAAAATAAATTTACTTAAAGTTTTTTTTTCCACAATAC--AATGCCCCACTA-TT-----CACCCGTCAGCCGAGCCGTAAGGCGAG  
GCTGCGGG  
TTACAAGG  
TTACGTGG  
TTACACGG  
TTACAGG  
TTACAGG  
TTACAGGGGG  
TTACGG  
TTACAGGGG  
TTACAGGG  
TTACGG  
TTACAGGGG  
TACGG  
TTACACGG  
TTACAGG  
TTACAGG  
TTACAGGGG  
TTACAGGGG  
TTACGG  
TTACAGG  
TTACAGG  
TTACAGGGG  
TTACAGGGG  
TTACGG  
TTACGG  
TTACAGGGT

NSU77

----TCGTTAAAAAAGTTAAGGGTAGGATAAAGCCAGTGAAGGACGTTAGCGATGAATAAGAGGAGTAATAAGTATGAAAAGGAATGACAATTAG  
AAAGATAGAAAAGAGATAGAAGATGAAAAATTGGAAAGTAGATGAAATTAGTGCATTCTATTACACTAAAAACAATCAACTAAATTTATTGAAAAAACA  
TTCGTTACAATTACTGGTGATGTGTGAGTGGCAATGAATATGTCAAATAGGAATGAATACGATATAGAAAAGTACAACCTTTTGTATTGTTGTTGAA  
AGTAAAAATAAAGTAGAGAATAAATAGTAAACAGATAAATGAAACAATGATGAAACAATAGAGAAAAGATTAATTTTCGTTAATTAATAAATAAATA  
AATAAATAAATAAATAAATAAATAAATAAATAAATAAATAAATAAATAAATAAATAAATAAATAAATAAATAAATAAATAAATAAATAAATAAATAA  
TAAAACCTGATAAAAAAATAAATAAATAAATAAATAAATAAATAAATAAATAAATAAATAAATAAATAAATAAATAAATAAATAAATAAATAAATAA  
ATGATAAAGTTGGAAGTGAATAAATAAATAAATAAATAAATAAATAAATAAATAAATAAATAAATAAATAAATAAATAAATAAATAAATAAATAAATA  
TAGATATCAACAC-----AAAAATTTATTGCCAAACAACGCAAGCGGTAGGCAATTTGAAA  
ATTTAAAAAATAAATAAATAAATAAATAAATAAATAAATAAATAAATAAATAAATAAATAAATAAATAAATAAATAAATAAATAAATAAATAAATA  
TGGAGGAATGGTAAATGCGATAGAGTATAGTAAAGCTAGATAACGAAAATGGATAAAGTCTCGTTATTGAAAAGAGGAAGGAGATGAAGGACAAGTGG  
AGTAAGTAGTGAGTCAAGTAAATGAGTCATGAAGAAGATGGTAGAGGCAAGGCGAGTAAACAAGTAAACAAGAGAGAGAATAAAGAAATGAGAATAA  
ATGGGGATAGAGTAGAGAGAGTAGGGAGAGTGAATAGAGAGAGTAGAGTAAAGTATGTTGAAATACGTAATAAATAAATAAATAAATAAATAAATAA  
AGAAAAGAAAATAGAAGAACAATAAATAAATAAATAAATAAATAAATAAATAAATAAATAAATAAATAAATAAATAAATAAATAAATAAATAAATAA  
AG-----ATAAGATAAATAAATAAATAAATAAATAAATAAATAAATAAATAAATAAATAAATAAATAAATAAATAAATAAATAAATAAATAAATAA  
ATTTGAAAAGGAAGCATGAGTTTATTATAGATTTAGAAAATAAATAAATAAATAAATAAATAAATAAATAAATAAATAAATAAATAAATAAATAAATA  
AGGTTCAATGCGATCGTGGAAATGGTAAAGTGGAAAAGACGAAGTAAAGTGTGTGGGATTCATTAAAGTATAAATAAATAAATAAATAAATAAATA  
TGAGAAGGATGAAAAATTTGAAGTTTGGACTCATTTGATGTGTGAAGCAGTAAAGGCGGTAAGGCGAGTAAATCGTTAAGCGTTGTAAAGGAGGGTAAGG  
AAATAAGGAAATGAGAGTAGAGAAGAGTAAGGAGAGTAAAGGAGAGTAAAGGAGGAGTAAAGGAGGATAGAGTAGAAGAGGAAAGTAAAGGAGGATAG  
ATAAGAGAAATGAGGAAATAAAAGAGCAATAAATAAATAAATAAATAAATAAATAAATAAATAAATAAATAAATAAATAAATAAATAAATAAATAA  
GGAGAAATAAGAAAGTAAAGTAAAGTAAAGTAAAGTAAAGTAAAGTAAAGTAAAGTAAAGTAAAGTAAAGTAAAGTAAAGTAAAGTAAAGTAAAGTAA  
ATAAATGAAGTGTTTGAAAATTTGAGCTTATGTTAGATATGTTAAATAAATAAATAAATAAATAAATAAATAAATAAATAAATAAATAAATAAATA  
TAAAATAAATAAATAAATAAATAAATAAATAAATAAATAAATAAATAAATAAATAAATAAATAAATAAATAAATAAATAAATAAATAAATAAATA  
ACAAAATTTGGAACAATAAATAAATAAATAAATAAATAAATAAATAAATAAATAAATAAATAAATAAATAAATAAATAAATAAATAAATAAATAAATA  
ATTTGAAAATAAATAAATAAATAAATAAATAAATAAATAAATAAATAAATAAATAAATAAATAAATAAATAAATAAATAAATAAATAAATAAATA  
GTAGTGTAGTGTGGTAGTGAAGATGGACAAAAC-----TGAATGAGTG-GAAGT-GAGTGTGTTGGGATGCAGTAAAGTATAAATAAGGGGAT  
GTAGTGTGATGAGTGAATAAATGGATGAAAA-----TTTGAAGTTGATTGAAT-GAGTGTGCTGGAGTACGTTAAAGGTTGATAGGGACAA  
GTAGTGTACTATAAATAATAGGATGGTAAAAATA-----TGAAGTTGACTCAGTTTTGATTGATTGAGTGGGT-----



TTGCCTTGTAGGACGCCAATAACCAATGATCTGAATCAACGGTTCTCTCGTACTAAGTTGAATTACCATTCGCACGACTTCATCAGTAGGGTA  
AACTAACCTGTCTCACGACGGTCTAAACCAGCTCACGTTCCCTATTAGTGGGTGAACAAATCCAACGCTTACCGAATTCTGCTTCGGTATGATAGGAA  
GAGCCGACATCGAAGAACTCAAAAGCAACGCTCGCTATGAGCGTTGGCCACAAGCCAGTTTCCCTGTGGTAACTTTCTGGCACCTCGCTCA  
AATTCGAGGGAACAAAGGATCGATAGGCCACACTTTCATGGTTGTATTACACCTGAAAAATCAAAATCAAGGGGACTTTTACCTTTTATTCTACTCG  
AGATTCTGTTCTCGATGAGTCCCCCTTAGGACACCTGCGTATCTTTAACAGATGTGCCGCCAGCCAACTCCCCACTGCACATGTCAACGC  
CGGATCAGTTCCGGAAGAACTTAAACGCTAGAATATGGGAAATAAATCCGCAATCCGCTTCATTGATTAAGTAAAGAAACGATAAAGGATGGTATT  
TCACCGCGTATGCCGAACACTACTCCACTTATCCTACACCTCTATGTCTCTTACAATGTCAAAC TAGAGTCAAGC TCAACAGGGTCTTCTTTCCC  
CGCTGATTTGCTGGCCCGTTCCCAAGGCTGTGGTTTCGCTAGATAGTAGATAGGGACAGTGGAAATCTCGTAAATCCATTTCAGCGGTCACTAGTT  
AGATGACGAGGCATTTGGCTACCTTAAAGAGAGTCATAGTTACTCCCGCGCTTACCCTGCTTGGTGAATTTCTTACATTTGACATTCAGAGCACTGG  
GCAGAAATCACCATTGCGTCAACACCACTTCTGGCCATCGCAATGCTATGTTTTAATTAGACAGTCAAGTCCCTTGTCCGTACCAGTTCAGTTGG  
TTGTTAAACGTACGCCAGTAAAGACATAATCCCGAGAAAGGAAAGCCGACCAAGGACTTCCCGGCCGCAAGGTC AAGCAGGTCCAACATCCCT  
TCTCACCCGAAAGCGAGAAAGACATCGGTCCACGCTCAGTCCAGCAACCGTTCAGGTTCCAAGGCCAACGTACCCACCTTAGAGCCAATCCCT  
ATCCCGAAGTTACGGATCCATTTGCGGACTTCCCTTATCATTTGTTCTATCAACTAGAGGCTGTTCCACTTGGAGACCTGCTGCGGTTATGAGTAC  
GACCAGATGTGAAAACAGGACCGGAAGGTCATTCTCCGTTGGATTTTCAAGGGCGCTGAGAGCGCACCGGATTCAGATGAGGGCCGTGAATCTT  
CCAAACACCTAACCTACGCTCGGATAAACCGATTTCCAGGTAGTTCAGTGGTTGTTTTAAAAGAAAAGAGAACTCTCCAGGGCTCCCGCCAGCTC  
TCCAACCTCATTACGTTGCGGTGTTGATTCCACCTTCTGGTTCGGAAATATTAACCGGATTCCTTTTCGATAGGAGGCCAGAAAAATCGTGCAACTTT  
CATACGGAGCTTCCATCTCTTAGGATCGACTAACCATGTCCAACCTGCTTTCACATGGAACCTTCCCCTTACGTTCTCAAAGTCTCATTGGA  
ATATTTGCTACTTCCACCAAGATCTGCAC TAGAGGCTGTTCCAGCCAGGCTTACCCTGCTTGGTGAATTTCTTACATTTGACATTCAGAGCACTGG  
GCTTCTCAAAGCTAACCCAGACGGTGAAGTATGGGTAGTAGCGTTAAGCGCCATCCATTTTCAGGGCTAGTTTCATTCGGCAGGTGAGTGTGTACACACT  
CCTTAGCGGATTCGACTTCCATGCCCACCGCTCTGCTGTAGTAGTAACACCTTTTCTGGTGTCTGATGAGCGTACATTCGGCACCTTAACCT  
CAGCTTCGGTTTCCAGCACTCGCCAGTTCGTTTACCAAAAAATGGCCCACTAGAACTCTCATTTCGATGGCCAGTCCAATTAAGCGACAGGGCGGT  
CTTACATATTTAAAGTTTGAAGATAGGTTGAGGAAATCCCTCCCAAGCACTCTAATCATTCGCTTTACCTCATAAAACGATCTGAGTTTCTGCTAT  
CCTGAGGAAACTCGGCAGGAAACGCTACTAGATGGTTCGATGCTCTTCCGCTTATCCCAAAATTTGAAGATCGATTTGCACGTGAGAATCTCT  
ACGAGCCTCCACAGATTTCTGCTTACCCTATTCAGGCAATAGTTCCACTTCTTTCGGTTCGCAACAGCTGTTCCGCTTCCCAACAGCTAGTGTCT  
TGACAAACTTCGCGGTGCGGTGATGTGCACGCCACAAGGGCGTTCCCACTGCTTCACTTTTTCATTCGCGGATGGGTTTTCATCACCACAACTCG  
CATAGATGCTAGACTTCTTGGTTCGTTTCAAGCGGGCATTGAAAACCTATGTGAGCATCTTGGCAGAAAGCCGAGTCTCAGTCCCACTCG  
GACGTATTCAACAAGGCTTAAACACTCCCAAGCGAAACCCGCAAGGCTTCCCTTATTTTTCGCGCCCAAGCTAGTGTCTTACCCCTTCCAT  
CACAGGTTCAGAGTGCATAGTCTCGGAAGGACTACTGATCTCACCCAGGTAAAGACTGATTTCCAATGCTTCCCTTTAGCAATTCACGTACTATT  
AATCTCTTTCAAAGTCTTTTCTCTTTCGATCACTTACTTGTGCTTTCGCTCTGCGCAATTTAGTCTTAGATGAAATTTACCACCCATT  
TAGAGCTGCATTTCCAAACAGCTGCATCTTCCAAAGCGCTTTTATAGGATCTTCAATGACCAAAAGAGCGGGTTCACCTCTCGTCCGCTGTT  
CCAAGGAACCTTAGACCGATCGTCTACACTCAAAGCAGCTTCTGAAATTAACAACGGAACAAAAAGAAATGTTGCGAGATTTCAAATTTGAGCTTTT  
CCCGTTCACCTCGCGTACTGAGGAAATCATGGTATTTTCTTCTTCCGCTTATGATGCTTAAGTTCAGCGCTGCTACCTGATTTGAGTTGAGG  
TCAAATCAAAAAGGCTGTGAAAAAAAATAAATTTTTTTTTTTCGTTAAGTTCAAAATAAAAAGGATTAATAACTTTTTAGTTATTTTCTTCTAA  
TTTTTTTTTTTCTATCAAAACAAGTGGAACAACTTATACGTTCAATAGAAAAAAAATGAAAAAGGCATAGAAAAATAAATTTCAATCTTCTTTTGT  
TTTCCCAATCGATTTCAAATAAATTTATTTTAAAAAAAACAATTTTCGTTCAACACTCATCAAAAATATTTAAAAAAAACATTTTTTTGTG  
AGAAGATTGTAATGACATCAAACAGGCATGCTTTCGAAAGCGCTTATAGGATCAACAGGCGAATGTCGCTTCAAAGTTTCGATGTTACCGAAATCTG  
CAATACGATTCGATTTGCTGCGTTCCTCATCGATGCGAGAGCAAGAGATCCGTTGCTGAAAGTTTAAATAAATTTATATATAGATATAATTAAT  
TCAGACTTCAAAAACAATTTCAAGGTTATAATTTAATTTGCTTCTTCCAAATTTCTTATATTTAAAAAAAAGAGAAAGATGAAAAATGATAA  
AATAAAAATAAATAGTAAAAAGATGATATGCTTGGCATGCAACAACCAACACCAAAAACCAATTCACCTCGTAAATTTTACAATTTCTTTTTT  
TTTTTCACTTTTCTTTTCTAAACACTTTTTTTTTTAATAAAAAAATAAAGAAAAGAAAAAAAATCAAATTTGAAATATTTT

## NSU21

AGGCTCGTTAAAAAAGTTAAGGGTAGGATAAAGCCAGTGAAGGACGTTAGCGATGAATAAGAGGAGTAATAAGTATGAAAAAGGAATGACAATTAG  
AAAGATAGAAAAGAGATAGAAGATGAAAATATTTGAAAGATAGTGAATTTAGTGCATCTATTACACTAAAAACAATCAACTAAATTTATGAAAACCA  
CGCTTACAATTTACTGGTACTGTGCTGAGCTGGCAATGAATATGCAATAGGAATGAAATACGATATAGAAAAAGTACAACCTTTGTTATGTTGTGAA  
AGTAAAAATAAAGTAGAGAATAAATAGTAAACAGATAAATGAAACAATGATGAAACAATGATGAAACAATAGAGAAAAAGATTAATTTCTGTTAATTA  
AAAAATAAATAAATAAATAAATAAATAAATAAATAAATAAATAAATAAATAAATAAATAAATAAATAAATAAATAAATAAATAAATAAATAAATAA  
AAAAATAAATAAATAAATAAATAAATAAATAAATAAATAAATAAATAAATAAATAAATAAATAAATAAATAAATAAATAAATAAATAAATAAATAA  
GTTATAGGTGATGATAAGTTGAAAGTGAATAAATAAATAAATAAATAAATAAATAAATAAATAAATAAATAAATAAATAAATAAATAAATAAATAA  
AAAGACAGTAAATGATTCACAACAC-----AAAAATTTATTTGCCAAACAACTGCAAGCGGTAGGCAATTTGAA  
ATTTAAAAATAACTATAAATTTATTAATAAATTTAATAAATAAATTTGAAAAGCTCGGTGAGTGTGATGTCGCGGGGAAAAAGGAAATGGAATG  
TGGAGGAATGGTAAATGCGATAGAGTATAGTAAAGCTAGATAACGAAATGGATAAAGTCTCGTTATTGAAAAGAGGAAGGAATGAGGACAAGTGG  
AGTAAAGTAGTGAGTCAGTCAGTAAATGAGTCAATGAAGAAGTGGTAGAGGCGAGGAGTAAACAAGTAAACAAGAGAGAGAAATAGAAATGAGAAATGAA  
ATGGGGATAGAGTAGAGAGAGTGGGAGAGTGAGTAGAGAGAGTAAAGTAGTGTGAAATACGTAATGAATAAATGAATAAATAGACAAGTAACTATATA  
AGAAAAGAAATAGAAAACAAAATAAACAAGATAAATAAATAAATAAATAAATAAATAAATAAATAAATAAATAAATAAATAAATAAATAAATAA  
AG-----ATAAGATAAATAAATAAATAAATAAATAAATAAATAAATAAATAAATAAATAAATAAATAAATAAATAAATAAATAAATAAATAA  
ATTTGAAAAGAAAGCATGAGTTTATTATAGATTTTGAAAAAAATATTTGAAAAGCTCGGTGAGTGTGATGTTGCGGGGAGAAATGAGAAATGAGGGGA  
AGGTTCAATGTCATCGTGGAAAGTGTAAAGTGGAAAAGACGAAGTAAAGTGTGTTGGGATTCATTAAGTATAATAGAGATATATAGTGTGATGATAAT  
TGAGAAGGATGAAAAATGAAAGTGAATGACTCATTGATGTGGAAGCGAGTAAAGGAGCCATAAGGCGAGTAACTGTTAAGCGTTGTTAAGGAGGGATAGGGA  
AATAAAGGAATGAGATAGAGAGAGTGGGAGAGTGAGTAGAGAGAGTAGAGTAGATGTTGAAATACGTAATGAATAAATGAATAAATAAATAAATAA  
TAAGAGAAATAGAGAATAAAGGAATAAAAGAGCAATAAACAAGGAAAAGAAAGTAAAAGAATAAAGAAGATAAAGGGATAAAGTA  
GGAGAAATAAAGAAATGAAAGTAAAGTAAGAAGAAAAGAAAGTGAATTAAGTTAA-AGTATGTTGGAGTGCAGTAAATTAATAGGAACATGCGGTGACTTTG  
ATAAATGAAGTGTTTTGAAAATTTGAGCTTATGTTAGATATGTTAAAATAAATAAATAAATAAATAAATAAATAAATAAATAAATAAATAAATAAATAA  
TAAATAAATAAATAAATAAATAAATAAATAAATAAATAAATAAATAAATAAATAAATAAATAAATAAATAAATAAATAAATAAATAAATAAATAA  
ACAAATAAATAAATAAATAAATAAATAAATAAATAAATAAATAAATAAATAAATAAATAAATAAATAAATAAATAAATAAATAAATAAATAAATAA  
ATTTGAAAATAAATAAATAAATAAATAAATAAATAAATAAATAAATAAATAAATAAATAAATAAATAAATAAATAAATAAATAAATAAATAAATAA  
GTAGTGTAGTGTGGTAGTAGTAGTGAAGTAGGACAAAACAC-----TGAATGAGTGAAGT-GAGTGTGTTGGGATGCAGTAAATTAATAAGGGGAT  
GTAGTGTGATGAGTGAATAAAGCGGATGAAAAA-----TTTGAAGTTGATTGAAATGAGTGTGCTGGAAGTACGTTAAAGGTTGATAGGGACAA  
GTAGTGTACTATAATAATTTAGGATGGTTAAAAATA-----TGAAGTTGACTCAGTTTGTATTGATTGAGTGTGATGTTGCTCGGGGAAAGATGA  
AACGAGCAGTAAAGCGAGTAATCGTTAAACAT-GTTAAAGTAAAAATAAAGAGGTAAAACATAGGAAGTATAAATAATTTG  
ATAGGTAGAATAAGTAAAGC-AGAAATAGGTAGA  
-----GTAGAATAGGTATAGGTAGAATAAGTAGA  
GTAGAGTATGGAAGAAAAGAGGAAAGAAAGTAAATGGAATAAAGAAATAAATAAATAAATAAATG  
GGAGAACAAGAAAGTAAAGTAAAGTAAAGTAAAGTAAAGTAAAGTAAAGTAAAGTAAAGTAAAGTAAAGTAAAGTAAAGTAAAGTAAAGTAAAGTAAAGT  
ATAAATGAAGTGTGTTGAAAATTTGAGCTTATGTTGATCATGTTAAACAATAATATGATTTGTAATAAATAAATAAATAAATAAATAAATAAATAAATA  
TAAATAAATAAATAAATAAATAAATAAATAAATAAATAAATAAATAAATAAATAAATAAATAAATAAATAAATAAATAAATAAATAAATAAATAA  
ACAAATAAATAAATAAATAAATAAATAAATAAATAAATAAATAAATAAATAAATAAATAAATAAATAAATAAATAAATAAATAAATAAATAAATAA  
ATTTGAAAATAAATAAATAAATAAATAAATAAATAAATAAATAAATAAATAAATAAATAAATAAATAAATAAATAAATAAATAAATAAATAAATAA  
GTAGTGTAGTGTGGTAGTAGTAGTGAAGTAGGACAAAACAC-----TGAATGAGTGAAGT-GAGTGTGTTGGGATGCAGTAAATTAATAAGGGGAT  
GTAGTGCATATGCGCAATGAGGATAGATGAATGAAAACCTGAAAGTTTATAGAAATAA-GCTGTGTTGTAATGCAGTAAAGTGAATAAAGATGATC  
CGAGTGTATTATGATAATCAAGATGGATGAAAAATA-----TGAAGTTGACTCAGTTTGTATTGATTGAGTGGGT-----











E

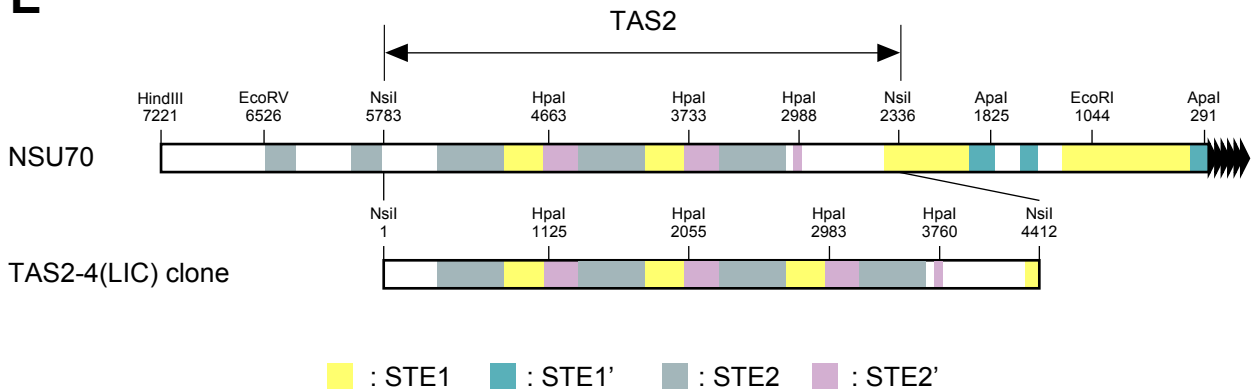

TAS2-4(LIC)

ATGCAATCGTGGAAATGGTTAAGGTGGAAGACGAAGTAAAGTGTGTTGGGATTCATTAAGTATAATAGAGATATATAGTGTGATATGATAATTGAGAAGG  
ATGAAAAATTGAAG-CTGACTCATTGATGTGTGAAGCGAGTAAAGCGCCATAAGGCGAGTAAATCGTTAAGCGTTGTTAAGGAGGGATAGGAAATAAAG  
GAATGAGAGTAGAAGAGGAAAGTGTAAAGGAGAGTGAAGAGGTAGAGTAGAAGAGGAAAGTGAAGAGGTAGGAGTATAGAAGTAGTAAATAGAGA  
ATAAGGGAATAAAAGAGCAATAAAACGAGGAAAAGAAAGTGAAGAAATAAAAGAGATAAAAGGGATAAAGTA  
GGAGAATAAAGAAGTAAAGTAAAGTAAAGAAAAGAAAGTGTGTTAAGTTAA-AGTATGTTGGAGTGCAGTAAAGTATAATAGGAACATGCGGTGACTTTG  
ATAAATGAAGTGTGTTGAAAATTGAGCTTATGTTAGATATGTTAAATAAATAATATGATTGCGTAAAATAAATAAAAAATAAAATGAAATGAAATAAAA  
TAAAATAAAATAAAATATTTAAAAACGAATAAATATATAGAATAAATAAAATTAATGAAATAAAATTAACAAAATAAAATGAAATAAAAAATATAAAT  
ACAATATTGGAACACAATAAAGACAAATTTAAATAATGATAGAAAATAATGAAAATAATTTATTTGCCAATGAATGACAAACAGCAGGCAGTTGAAA  
ATTGAAAATAAATATAAAATGATTAAATAAAGAAAAAAATTTGAAAAGTGTGTTGAGTGTATGTCGTCGGGAAGAAATGA  
GTAGTGTAGTGTGGTGTGAGATGAAGATGGACAAAACAC-----TGAAATGAGTG-GAAGT-GAGTGTGTTGGGATGCAGTAAAGTATAATAAGGGGAT  
GTAGTGTGCATGAGTGAATAAACCGGATGAAAAA-----TTTGAAGTTGATTTGAATT-GAGTGTGCTGGAGTACGTTAAAGGTGATAGGGACAA  
GTAGTGTACTATAAATAGGATGTTAAAAATA-----TGAAGTTGACTCAGTGTGTTGATTCAGGTGGGT-----  
AACGAGCAGTAAAGCGAGTAATCGTTAAACAT-GTTAACGAAATATAAAAAGAGGTAACATAGGAAGTATAAATATTGG  
ATAGGTAGAATAAGTAAAGC-AGAATAGGTAGA  
-----GTAGAATAGGTATAGGTAGAATAAGTAGA  
GTAGAATATGGAAGAAAGAGGAAGAAAGTAAATGGAATAAGAAATAAATAAAAAATG  
GGAGAACAAGAAAGTAAAGTAAAGTAAAGAAAAGAAAGATACAATGAAGGGGACTATGTTGGAGTGCAGTAAAGTATAATAGGAACATGCGGTGACTTTG  
ATAAATGAAGTGTGTTGAAAATTGAGCTTATGTTAGATATGTTAAATAAATAATATGATTGCGTAAAATAAATAAAAAATAAAATGAAATGAAATAAAA  
TAAAATAAAA-----TATTTAAAAACGAATAAATATATAGAATAAATAAAATTAATGAAATAAAATTAACAAAATAAAATGAAATAAAAAATATAAAT  
ACAATATTGGAACACAATAAAGACAAATTTAAATAATGATAGAAAATAATGAAAATAATTTATTTGCCAATGAATGACAAACAGCAGGCAGTTGAAA  
ATTGAAAATAAATATAAAATGATTAAATAAAGAAAAAAATTTGAAAAGTGTGTTGAGTGTATGTCGTCGGGAAGAAATGA  
GTAGTGTAGTGTGGTGTGAGATGAAGATGGACAAAACAC-----TGAAATGAGTG-GAAGT-GAGTGTGTTGGGATGCAGTAAAGTATAATAAGGGGAT  
GTAGTGCATATGCGCAATGAGGATAGATGAATAAACCTTGAAGTTTATAGAATAA-GGCTGTGTTGTAATGCAGTAAAGTGAATAAAGATAC  
GCAGTGTATTATGATAATCAAGATGGATGAAAAATA-----TGAAGTTGACTCAGTGTGTTGATTCAGGTGGGT-----  
AACGAGCAGTAAAGCGAGTAATCGTTAAACAT-GTTAACGAAATATAAAAAGAGGTAACATAGGAAGTATAAATATTGG  
ATAGGTAGAATAAGTAAAGC-AGAATAGGTAGA  
ATAGGTAGAATAAGTAAAGC-AGAATAGGTAGA  
ATAGGTAGAATAAGTAAAGC-AGAATAGGTAGA  
GTAGAATATGGAAGAAAGAGGAAGAAAGTAAATGGAATAAGAAATAAATAAAAAATG  
GGAGAACAAGAAAGTAAAGTAAAGTAAAGAAAAGAAAGATACAATGAAGGGGACTATGTTGGAGTGCAGTAAAGTATAATAGGAACATGCGGTGACTTTG  
ATAAATGAAGTGTGTTGAAAATTGAGCTTATGTTAGATATGTTAAATAAATAATATGATTGCGTAAAATAAATAAAAAATAAAATGAAATGAAATAAAA  
TAAAATAAAA-----TATTTAAAAACGAATAAATATACAGAAAATAAATAAAATTA-----CAAAAATAAATGAAATAAAAAATATAAAT  
ACAATATTGGAACACAATAAAGACAAATTTAAATAATGATAGAAAATAATGAAAATAATTTATTTGCCAATGAACGACAAACAGCAGGCAGTTGAAA  
ATTGAAAATAAATATAAAATGATTAAATAAAGAAAAAAATTTGAAAAGTGTGTTGAGTGTATGTCGTCGGGAAGAAATGA  
ATTGAAAATAAATCATAAATGATTGATAAAGAAAAAAATTTGAAAAGTGTGTTGAGTGTATGTCGTCGGGAGGATGG  
GAAATTTGAGGATGGTCAATTTTAAATAAAGGAAAAAAATTTCAAAGTTCACTTAGTCAGGTGTGAAGCGAGC  
AACGAGCAGTAAAGCGAGTAATCGTTAAATGTTGTTAACGAA  
GACAAGAAATGTAACGATAGAATTTAAGAGTAAATATAGAGAGAAGAGTAGGATGAAGGAGCAGGATATATAAGTAGAATATATAGAAGAAATAGA  
GTAAGGAGAG  
TAAAATAAATAAATAAATAAATAAATAAATAAATAAATAAATAAATAAATAAATAAATAAATAAATAAATAAATAAATAAATAAATAAATAAATAAATAA  
GGTAGGAGAAATAAAGAAAGCAATTAAGTAAAGGAAAGAAAGATAAAGAGCAGGGGACTATTTGGAGTGCATTAAAGTAAAGTAAAGGATGAGTAAAGTAA  
ATAGTAATATGATAGACAAAGTGGTTGAAATTAATGTGTTGGGATGCAGGAAATATAAATAGAGAATTTGAGTGGACTTTGGTAATTAAGGGGATGAAAA  
ATTTGAAGTTGACTCAGTGTGAGTGGATAACGAAGTAAACATATGGAATAAGGAAATGAAGGAGAGAATATAAGTAGGATATATAGAAGAGA  
GTAGAAATCAAAAAATAAAGTAAAGGAG  
TAAA-TTAAATATTTAAAAACGAATAAATAAATAAATAAATAAATAAATAAATAAATAAATAAATAAATAAATAAATAAATAAATAAATAAATAAATAA  
GTAGGAGAA-----GAAGAAGTAAATCAAA-----GTAAGAGAGTATTAGA-----AAGTAAAGTAAA-TAAGGATGGATAC  
ATAGTGTATATTGGAAGTCAGATGCAAT

Supplementary Figure S2. The fission yeast subtelomere DNA structure. (A) Chromosomal view of the repeats located proximal to the telomeres. The nomenclature of the repeats is the same as that used in Figure 1A. The copy number of STE2 in each TAS2 is also indicated. (B) Graphical summary of the DNA structures found in the fission yeast telomeric clones in the Sanger Institute database (pNSU70, pNSU71, pNSU77, pNSU21, pNSU64, and pNSU65; available from the Sanger Institute ftp site: <ftp://ftp.sanger.ac.uk/pub/yeast/sequences/pombe/telomeres/>). The numbers associated with the restriction sites refer to the original numbering of the clones. The repetitive units STE1, STE1', STE2, and STE2' are indicated in yellow, cyan, grey, and lavender, respectively. STE1 is a tandem repeat of approximately 88 bp, whereas the other repeats are essentially composed of unique sequences, although STE2' harbours a direct repeat (see (D) for details). The tel repeat region is represented by a stack of filled triangles. The relative positions of TAS1 (ApaI/EcoRI), TAS2 (NsiI/NsiI), and TAS3 (EcoRV/HindIII) are also indicated for each clone. For pNSU77, the fused rDNA sequence and the break point (BP) beyond the tel repeats are indicated. (C) Sequence alignment of the STE1 repeats found in pNSU70. The numbers refer to the original numbering of the clone. (D) Sequence analyses of pNSU70, pNSU71, pNSU77, pNSU21, pNSU64, and pNSU65. The shaded sequences indicate the repetitive units of STE1, STE1', STE2, and STE2', with the same colour coding used in (B). The restriction sites shown in (B) are highlighted in magenta. The primers used for amplification of STE2 by qPCR are underlined in every STE2 repeat (to confirm their capacity to bind to each repeat with one nucleotide degeneration, as indicated by a dashed line). The reference sequence of telomeric DNA (43) takes into account the sequence of pNSU70. (E) The genomic sequence of the longest TAS2 clone. The wild-type genome was digested with NsiI, and the fragments encompassing TAS2 were cloned directly into a vector via ligation-independent cloning (LIC) technology. The structural properties found in the longest TAS2 clone (TAS2-4(LIC)) were colour-coded as described in (B).

## A

## cd1-31 (1R;2L)

(H1) cen ==> AAAGAGATAGAAGATGAAAATATTGGAAAGTA---GATGAAATTAGTGCATTCTATTACACTAAAACA  
(H1') tel <== ..... GAT ..... C  
AATCAACTAAATTATTGAAAAACAGTCGTTACAATTACTGGTGTGTTGTCAGCTGGCAATGAATATGTCAAATAGGAATTG  
..... A . A .  
AATACGATATAGAAAAGTACAACCTTTTGTATTGTTG ..... T ..... -  
..... GAGAAAAGTACAACCTTTTGTATTGTTATTGAAAGTAAAAAATAAAGTAGAGAATAAAGTAGTAACAGATAA  
..... G ..... ==> tel (H1)  
TGAAACAATAATGAAACAAATAGAGAAAAAGATTAATTTTCGTTAATTA <== cen (H1')

## cd1-65 (1L;2R)

(H3) cen ==> GTAAAATCTCGCTATTTGTTTGTATTGTGAATGATGAAGAGTCATGGGAGATGAATGTTGTAAACG  
(H3') tel <== ..... G A .....  
ATGGCATAGAATTGGTAACGAAAAGTGAATCATTGGGATCAACTATTTTCAGTATTTTGTTTAAAGAAAATGTTGAACTCGC  
..... GTTGGGATCAACTATTTTCAGTATTTTGTTTAAAGAAAATGTTGAACTCGA  
..... - TC T  
CAAGTAATGAGAGGTGGTGTCTTTCGTTAAATAATGAGTGGTGGTTACGGTTATACAGGATATGATCTGTGTATGGTGAGAAT  
..... ==> tel (H3)  
GTGATGTATGTATTTGAGTATAGACAAT <== cen (H3')

## cd1-47 (1L;2L)

(H4) cen ==> GCAAATGGGAAGACACGAATCATGATCGC-TACCAAGGCATTGGACTCGGTATCAACTATATGGGAG  
(H4') tel <== ..... A ..... T G ..... G T .....  
TGCGTTTAGTAGTACACTATGATTACCAGCTTCATCTATGGATTATGTACAGGAGACAGGTGCGAGCTGGAAGAGATGGCAA  
..... AGATTACCAGCTTCATCTATGGATTATGTACAGGAGACAGGTGCGAGCTGGAAGAGATGGCAA  
GTATGCGATTGCAGCATTGTTTTACGAGAAAATATGATTCTACATGGTCGAGCTACGTA  
GTATGCGATTGCAGCATTGTTTTACGAGAAAATATGATTCTACATGGTCGAGCTACGTGGAGGATTCGATGAAAACTTTCTT  
AATGATAATACGATGTGTGTTTCGATCGTTTTCTCGCAAGTGAATGGATGGCGAATGTGTATGTTGTGCATCGTTTGCTAACT  
GTGTTTACTGCTCAAGATGCTCAGATTCGTTACTTGGTGAAGAATCAACTGTGTCTACGATGTATGGAGTGAAACCGACATT  
GCCAGAAACACCGAAACCAGCCATTGCAACACATTCGCGTTATAATGCATCGTTTTCTGCTTCCCCCCCCACCACAGCCAGGG  
A  
AGTAGCAGTGGTATGAGTGCTATGAACACTAACACTACTAGTACTACGCCAGTGTCT <== cen (H4')

## cd1-51 (1R;2R)

(H5) cen ==> TAATGATAATGACAATGATGTGTTTCTCAAATTACATTGGTCTAAATCTGCTATTAATAAAGTATGAGA  
(H5') tel <== ..... C ..... C .....  
CAAAGGCATCTATCTTCAATGAGTTATTGTTTTGCTAGTGTAC--ATATCTGCTGGACAACCAGCCAGAGCA CAAGAGATG  
..... A ..... T ..... AT ..... TG .....  
GTGTATTGGACTTTGCGGAATGGCAAGTATAAGACTCGCAATTGTATTTGATGTTGGAAGGCTGATGATTTACAGCAGAT  
..... A T A ..... A .....  
ACGATAAGACTCGTAATATGAAGTTTGTGAAAAGCCAATCCCCAGGTTTCTTTCTGAGCCGCTTTCCATTTTAGCACTTCG  
..... A ..... T .....  
GTACTATGTTTTGGTTGACCATTTGGAAGCATTGATGAAGTATGTGACAACCGCTGATAGGTGCAAAAGTAGCTGTAT----A  
..... A ..... C GCAC .....  
CTTGATTTTCATGTTTGTATTGCTGGCGAACGATTGCAAAGAGATTTACCGTATCGAATTTTTCAAAGGCCACTACCAA  
..... T ..... T ..... TCTACCAA .....  
TGCATTCA ..... G ..... G ..... T ..... G ..... A .....  
TGCATTCA ..... GAAACCGTTGGGATTTCAAACCTACAGACACATTGCTCACTACTTTAAAGAAAAA GAACATCGAGAAAGCATG  
..... G ..... A ..... G ..... G .....  
ACGAGAGAAATCTTATTTTCGATTTACAGGCTGAACATACACGAAACACAGCGCTCTACATCTATGGACGCACTATGGACAAC  
..... G ..... C ..... A ..... T .....  
TGCATTATCTGCCATCGGATTTTTCGTTCAACTTTTTTCGTGCAAGCTATAAGTGGCAGGAACTATTGCAGATTCGAGACAA  
..... C ..... G ..... A ..... T .....  
CCCGACCCATGGATTGTTGGTGAAGAAACAAAGCACCCATTTCATCAAGCGAGTTGATCAATTGGAG <== cen (H5')

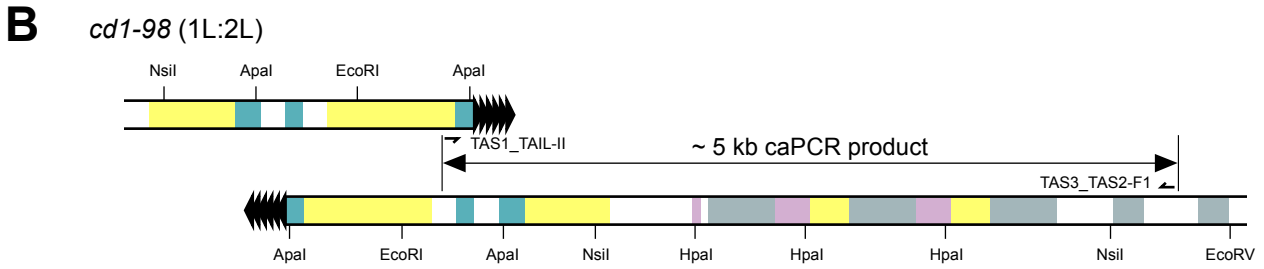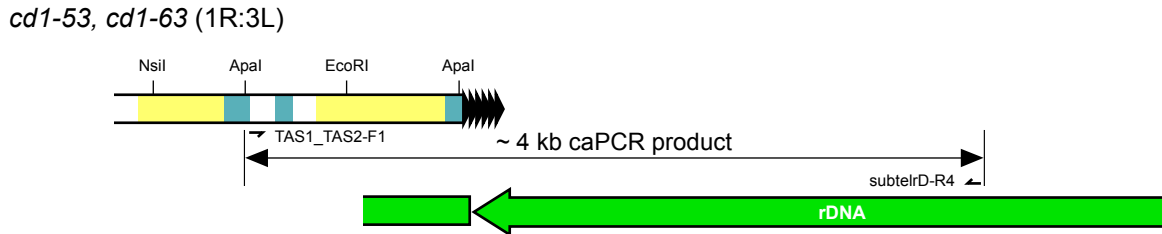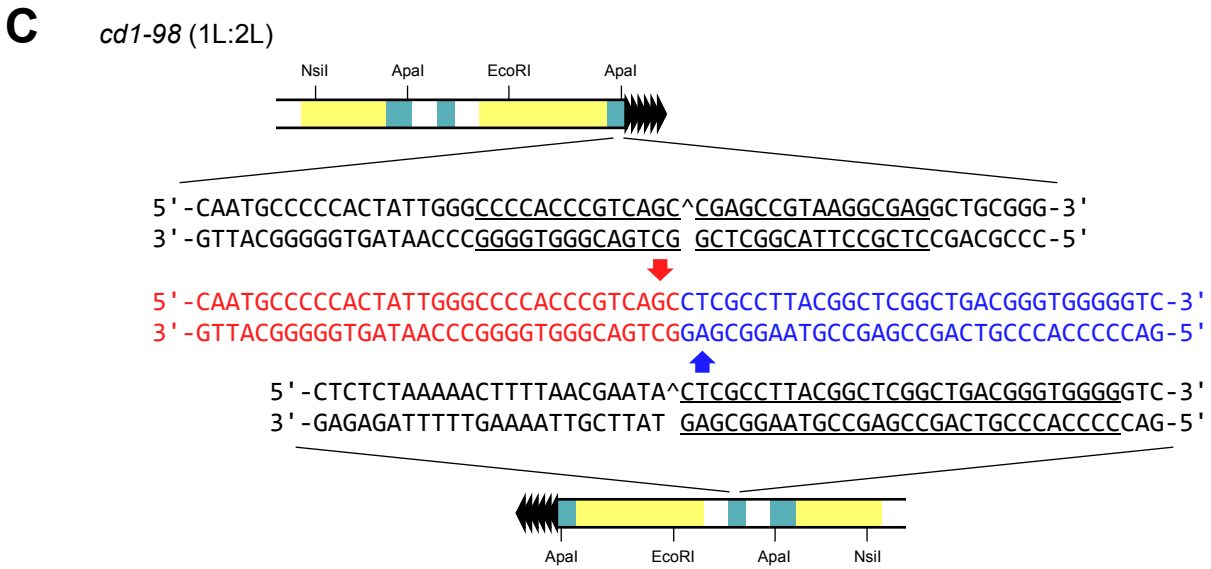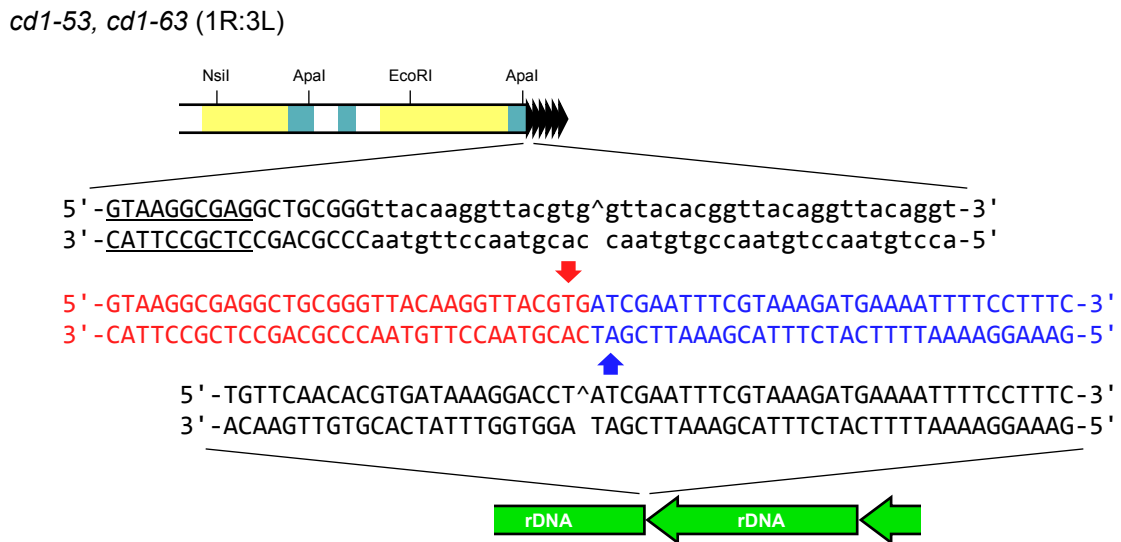

Supplementary Figure S3. Sequence analysis of the chromosome fusion junction. (A) Alignment of the inversely homologous subtelomere sequences and the actual fusion sequences of *cd1-31*, *cd1-65*, *cd1-47*, and *cd1-51* (grey-shaded text). Nucleotide degenerations in the original subtelomere sequences are highlighted in red and blue. The actual fusion sequences were determined by sequencing the gPCR products. The site of crossover in the fusogenic sequence can be confined to a limited segment according to the choice of degenerated nucleotides, which is indicated by the overlapping grey-shaded text. The nomenclature of the homology segments (H1–H5 and H1'–H5') follows that described by Wang and Baumann (43). (B) Schematic diagram of the NHEJ-type fusion (*cd1-98*, *cd1-53*, and *cd1-63*). Colour coding of the DNA structures is the same as that used in Supplementary Figure S2B. The primers sets used for the gPCR analyses of the  $\Delta cen1-f$  rearrangements are also shown. (C) Experimentally determined junction sequences. Subcloning and subsequent sequencing of the gPCR products revealed that all of the fusion events were attributable to the canonical NHEJ pathway.

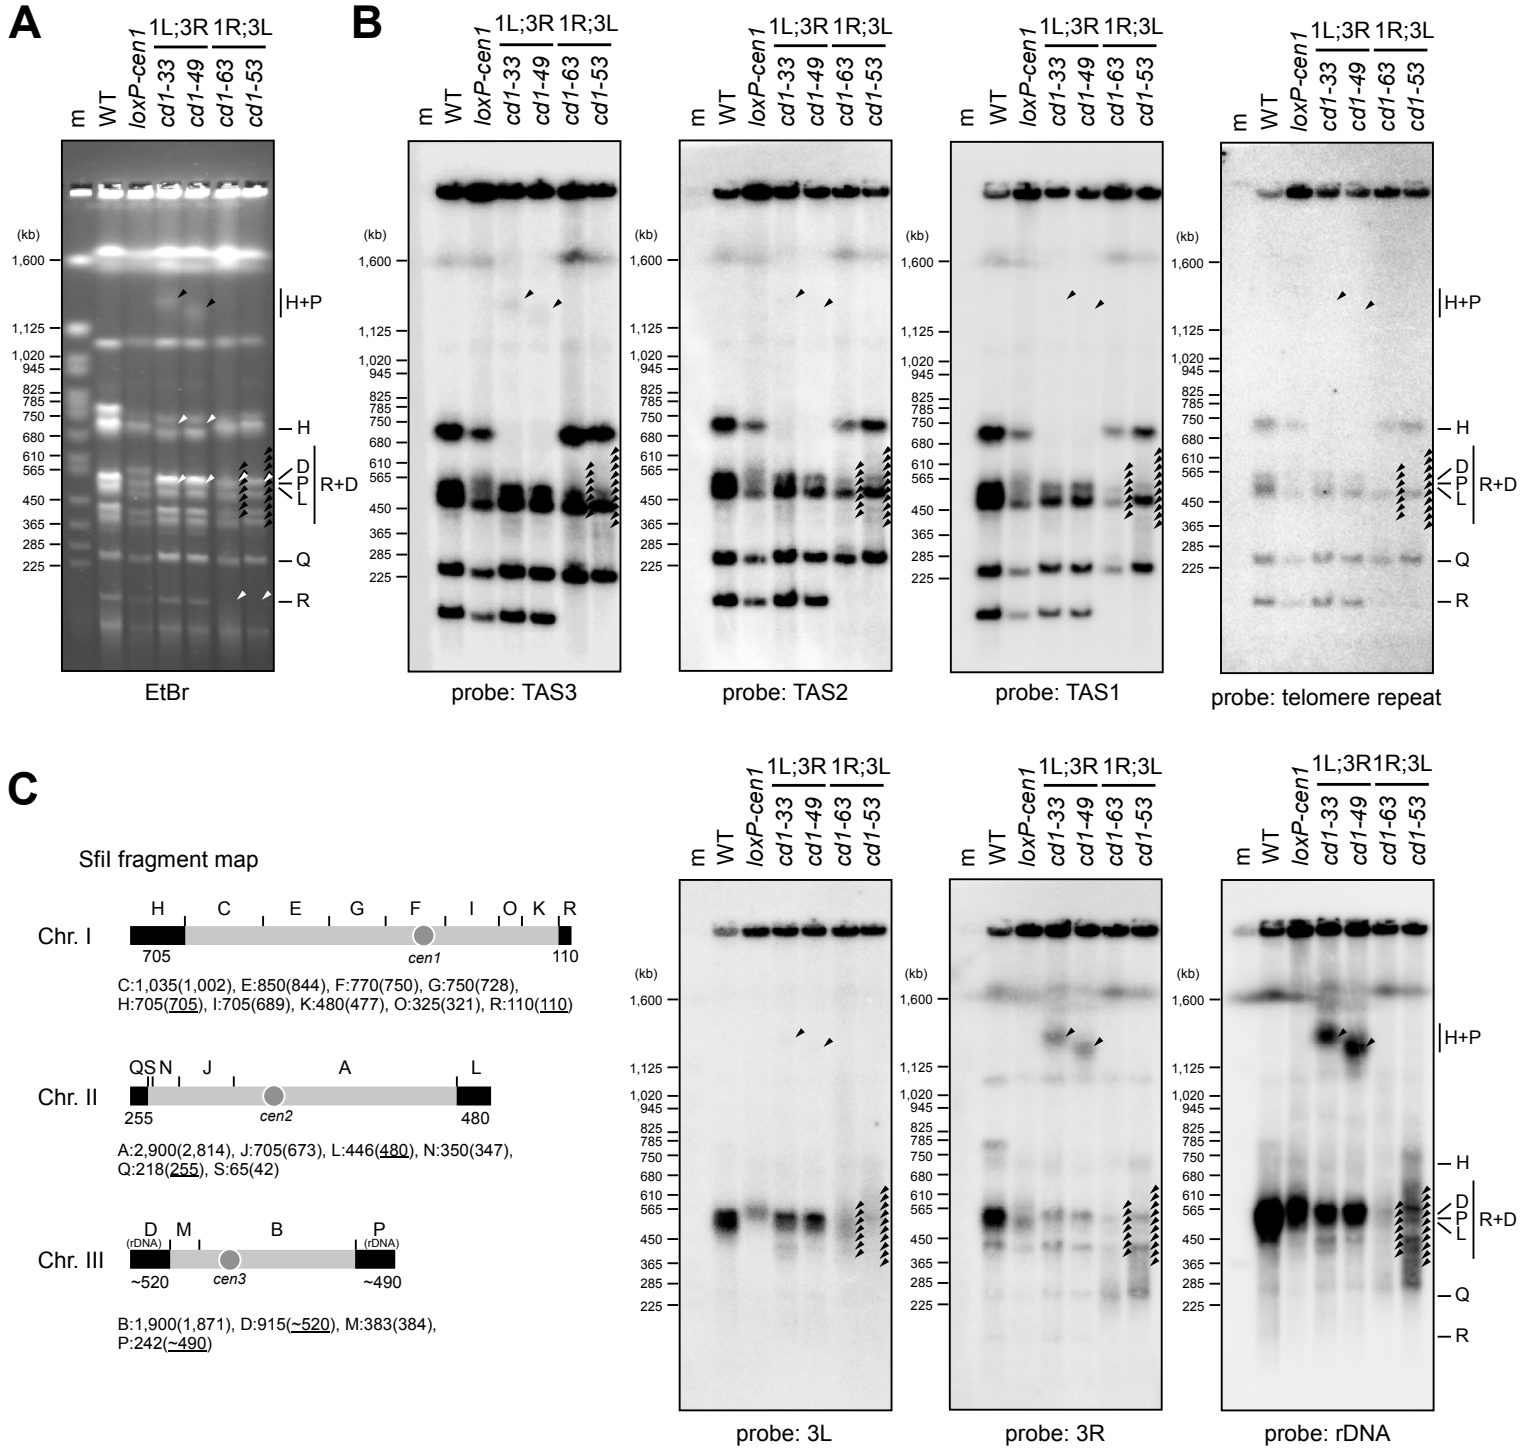

Supplementary Figure S4. SfiI digestion of chromosome III-related fusion survivors. (A, B) PFGE analyses of SfiI-digested chromosomes in the  $\Delta cen1-f(1;3)$  survivors. The gel was subjected to EtBr staining (A) and Southern blotting with the indicated probes (B). The white arrowheads indicate the SfiI bands that disappeared in the survivors due to fusion, and the black arrowheads indicate the newly-generated fusion bands. The identities of the bands with altered expression levels are shown at the right-hand side of the gels. The nomenclature of the SfiI fragments follows that described by Fan et al. (64) (see (C)). Because the rDNA repeat length was variable, particularly in the survivors, the band intensity of the SfiI fragment containing rDNA was low on some occasions. m, molecular size marker. (C) Schematic diagram of SfiI fragments localised along the fission yeast chromosomes, with emphasis on the terminal fragments. The SfiI-digested fragment sizes reported by Fan et al. (64) are indicated below each chromosome. The values in parentheses correspond to the fragment sizes calculated from fission yeast whole-genome sequences. The underlined values in parentheses correspond to terminal fragments that were not precisely defined in the database; thus the experimentally determined values from our wild-type laboratory yeast strain and the values described by Fan et al. (64) are shown.



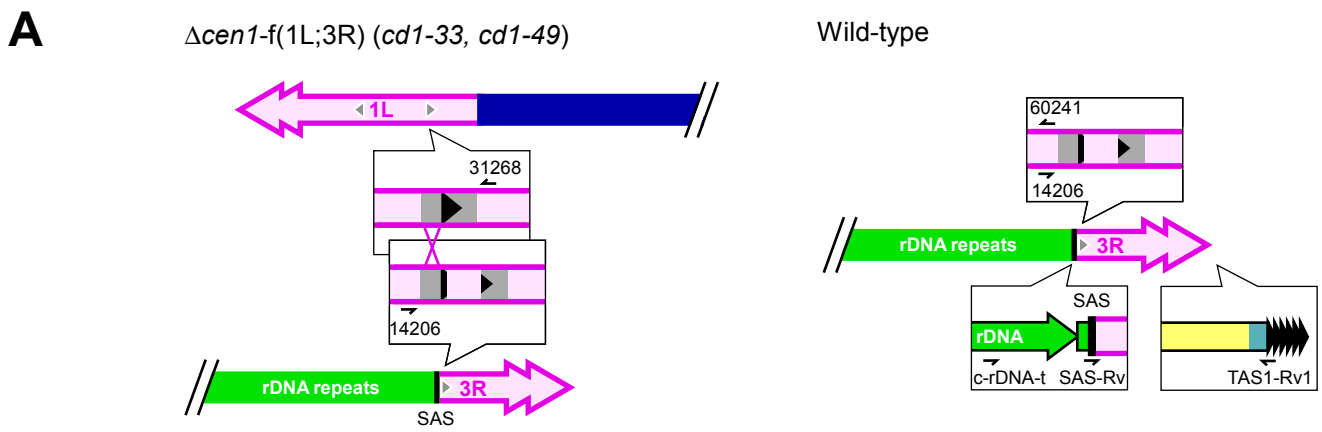

**B**

(rDNA) ==> TAGAGGTGGAGATGGGTAGGATTGGATGGTTTGTGAGATGGGAAATGACGTAAGAATTGGAATTTAACGAGAGAGAACGAGTCTATCTCGGTTGTTTTGG  
 CATGTCTATCTCAGTTATGAATAGGGAGAGTTAGGGATAGAGAACGTATTCGATGAGAATCAACGATGAGTAACGAGAGGGGAATGAAATGGAACGAGAACAGACCAGAGT  
 CATCGTTTCAATGCAATGCCATGCCATGTCAATGCCATCTCATTACGAATAACGTAGAGTAAGGAAAAAAGGACATCTCAGTTATGAAATGAGTCGTATCTCACTTATGAA  
 TAAGGAGGAGTAGGGAAAAAGGAAAAATAAAAAATAAAAAATAAAAAATAAAAAATAAAAAATAAAAAATAAAAAATAAAAAATAAAAAATAAAAAATAAAAAATAAAAA  
 TAAAAATGAATAAAAAAATGTTTATTCAATGAAATTGTTTAAATAAATAAAAAATACAAAATTCGAAAAAAAACAATTGTATTACTTTTCTTTTTTTTTTTTCATTGGCAATA  
 AAATGGAATTGTTTGGTTACACAACCTATTATTTTCATGAACCTTTAAAAAATTTGTTGAATAAAAAGAAGAAAAAGAAAAGAAAAGAAATCATTTTAAATTTTATCAAATTCG  
 CTATACATAAAGATTTTAGAGAGAATGGATTATCTTTTGGTATTCAAAGTAATAGGAAGGGTGAGGCAAAACCCCTTTGGTGGGAAGTGGATTTTCTGTAGTACTGCGTAT  
 TGCCTTCGACAAATGTCAAACCTACCCTAGAAGCACCAGATATGGATGAAATTCACAAAGTAGCACCACCTTCTACAAAATCGAGGAAAACCTAGGTCAAAGGTAGTATGTAA  
 AGGGGTAGAGGGGAGGAGAATAAAAAAAGTTTCAAGTCGAAACTTGTCAAGTTGAAAAAAAAGTTTCAATCTTTTATACTTGGATGCTCTTTGACATGGCTGTCAATTTCTGT  
 CATTTTCGATGGCTGGTCTATTTCACTTTTAGGCTGGTCAACAGGGTTTGATAAGCGATGGCTGACTGGGCTGGCTACTGTTTACATTCGTTATATAAATGCAAACCT  
 TTTTATTGTTGATACATTATTTATCCCTTCATTTGTTGTTTTACATTTCTACTGCC ==> (subtelomere)

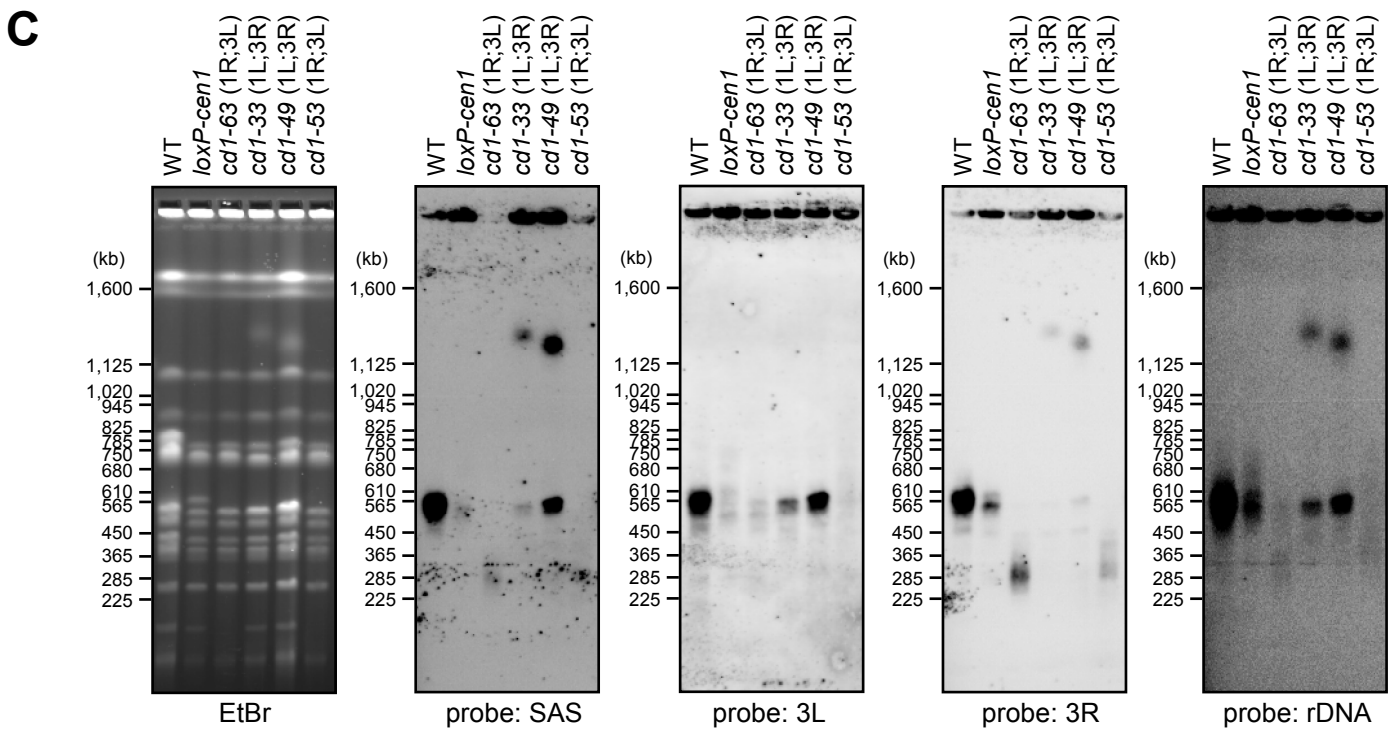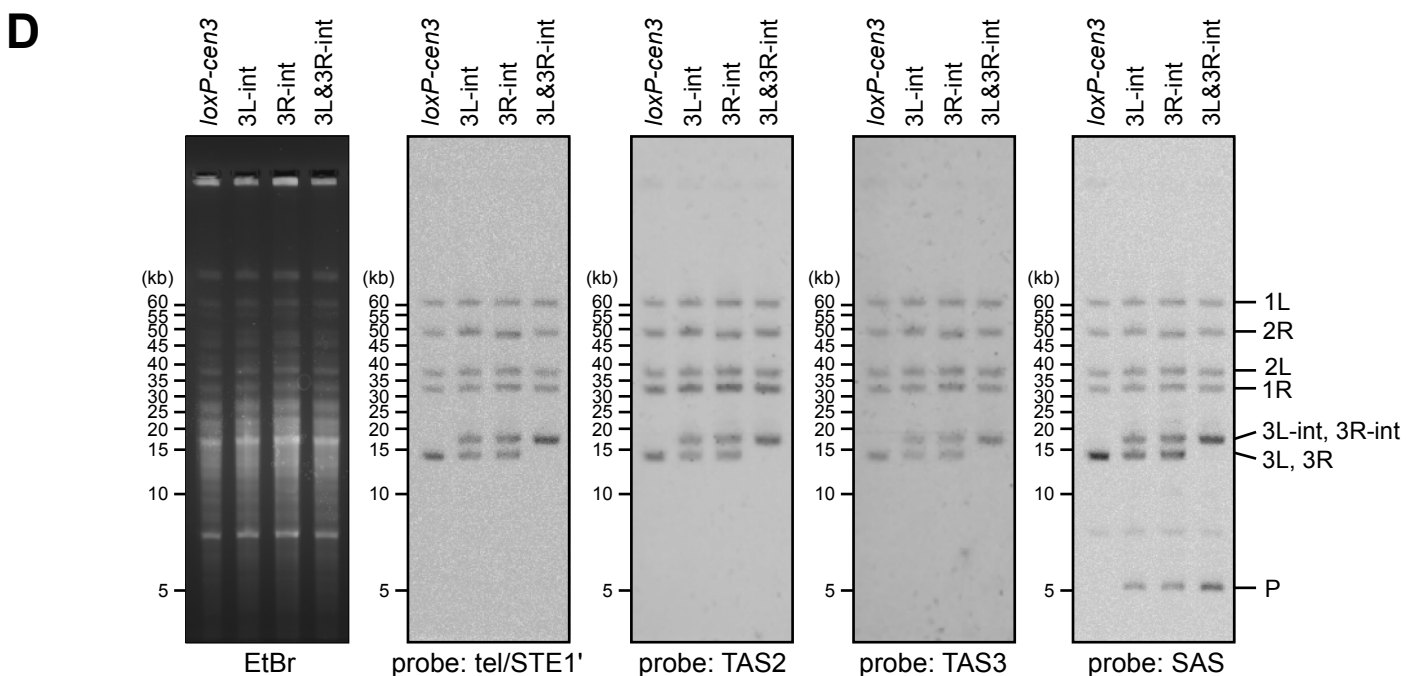

Supplementary Figure S5. Identification of a novel sequence (SAS) located between the rDNA repeats and the subtelomere region of chromosome III. (A) Overview of the gPCR analyses. The left panel shows a gPCR analysis using primers 31268 and 14206 to identify the fusion point in the  $\Delta cen1-f(1;3)$  survivors (*cd1-33* and *cd1-49*). The success of the gPCR analysis suggested the existence of a 31268- or 14206-corresponding sequence at the terminal region of 3R. The right panel shows a gPCR analysis of the wild-type genome using primer 60241, which was complementary to 14206, together with a series of rDNA primers that hybridised in the outward orientation. One of these primers, c-rDNA-t, yielded a gPCR product containing a novel 1169 bp sequence (SAS) located between the rDNA repeats and the subtelomere sequence. The end-adjacency of SAS was confirmed further by a gPCR analysis with an SAS-specific primer (SAS-Rv) and a terminal primer (TAS1-Rv1). (B) Sequence analysis of SAS. The SAS sequence showed 89% homology with a newly identified sequence at a chromosome BP of the *S. pombe* isolate strain CBS2777 (54). It also exhibited weak homology to STE2 (81% identity over 54 bp), possibly causing cross-hybridisation with TAS2 in some Southern blot analyses (see (D)). (C) The existence of the SAS at both ends of chromosome III, as confirmed by Southern blotting of SfiI-digested chromosomes. A pair of chromosome III terminal fragments in our wild-type laboratory yeast strain migrated at almost the same position in PFGE experiments, making it difficult to assess the existence of the SAS. However, fusogenic rearrangement in the  $\Delta cen1-f(1;3)$  survivors (*cd1-33* and *cd1-49*) altered the migration position of one of the fragments. The observation of two SAS hybridisation signals in these strains effectively localised the SAS at both ends of chromosome III. (D) The presence of subtelomere repeats at the SAS-distal ends of 3R and 3L. A plasmid containing a BamHI site was integrated into one or both SASs at 3R and 3L in the *loxP-cen3* strain (40). To confirm the presence of TAS3, TAS2, TAS1 (STE1'), and tel repeats in the SAS-containing fragments, BamHI-digested chromosomes from the resulting integrants were subjected to PFGE followed by Southern blotting. The identities of the other subtelomeric bands were determined by PFGE and Southern blot analyses of the integrants in which TAS3 of any of the chromosomal ends could be distinguished by a newly created BamHI site (data not shown). P, plasmid-sized genomic fragment generated due to the sequential integration of multiple plasmids into the target locus of the host genome.

Supplementary Figure S6

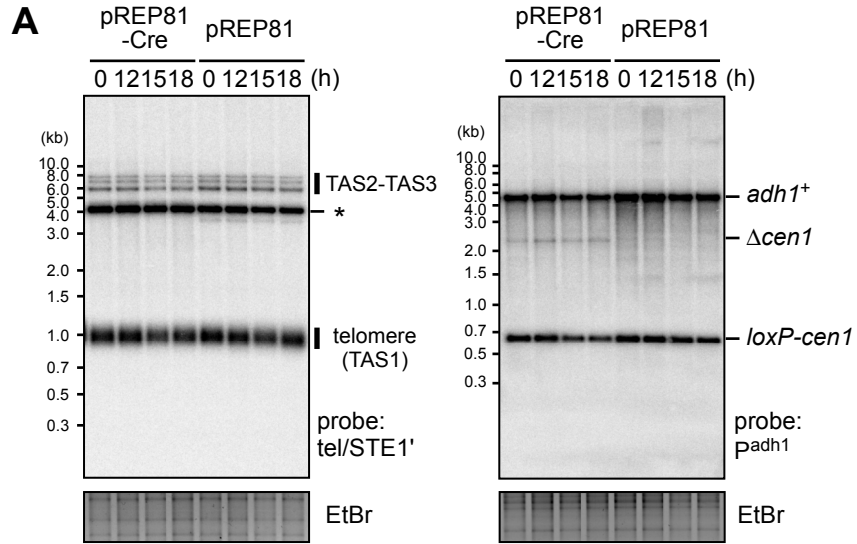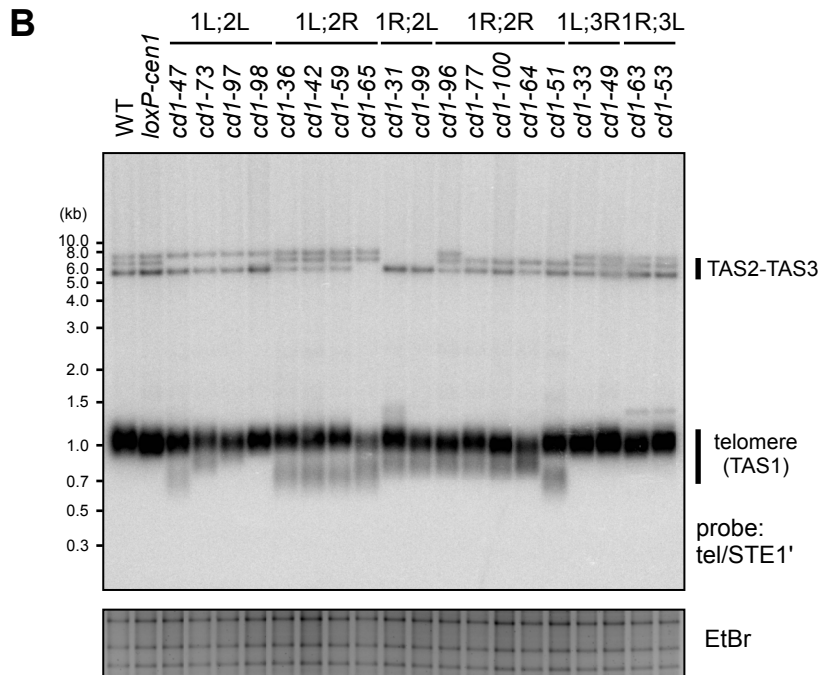

Supplementary Figure S6. The telomere length remains constant during the induction of centromere deletion. (A) Southern blot analyses of genomic DNAs recovered from *loxP-cen1* cells harbouring a Cre-inducible plasmid (pREP81-Cre) or empty vector (pREP81) (42). The DNAs were digested with EcoRI (left), or BsiWI plus BssHII (right), at the indicated time (h) after induction. Southern blotting was performed using probes encompassing both the tel repeats and the STE1' repeats (tel/STE1', left), or the *adh1*<sup>+</sup> promoter region (P<sup>adh1</sup>, right). EtBr-stained images of the gels are shown as loading controls. The TAS2-TAS3 bands in the left-hand gel indicate signals that were most likely derived from the STE1' repeats located between TAS1 and TAS2 (see Supplementary Figure S1). The asterisk indicates a non-specific hybridisation signal that was not reproducible. The *loxP-cen1* signals in the right-hand gel were derived from the intact *cen1* genome, whereas the  $\Delta$ *cen1* signals correspond to *cen1*-excised DNA. The *adh1*<sup>+</sup> signals were derived from the endogenous *adh1*<sup>+</sup> gene, which remained at constant levels. By contrast, decreased *loxP-cen1* and increased  $\Delta$ *cen1* signals were observed upon Cre induction. (B) Southern blot analyses of genomic DNAs recovered from the indicated telomere-fusion survivors. The experiment was performed as described in (A). Variations in the TAS2-TAS3 signal intensity are representative of subtelomere instability in the survivors. Alterations in the telomere signal were stable and specific to a given chromosome; hence, they most likely reflect instability of the TAS1 repeat rather than the tel repeat.

**A**

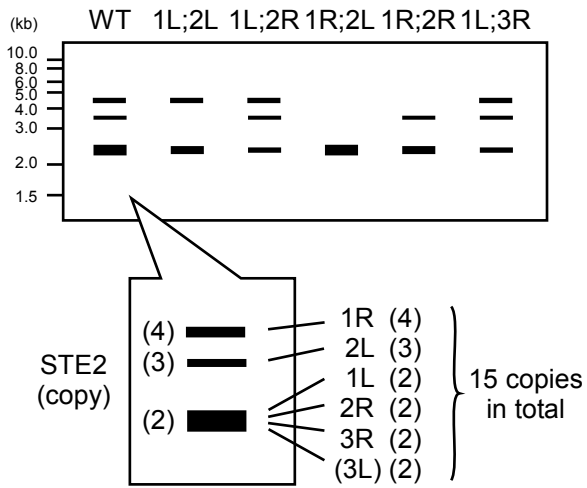

**C**

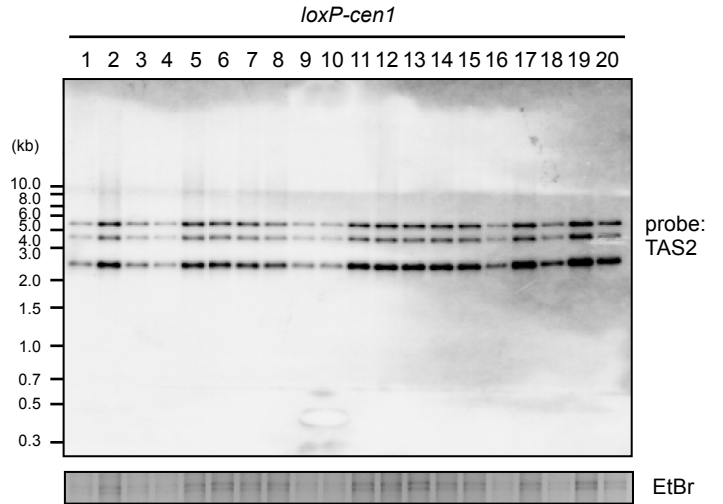

**B**

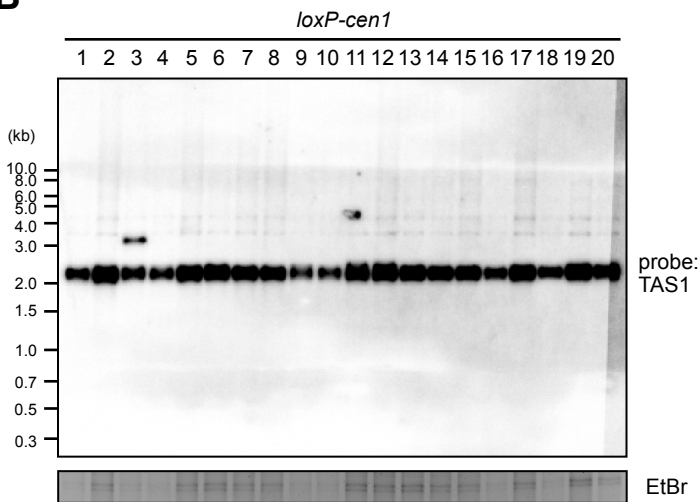

**D**

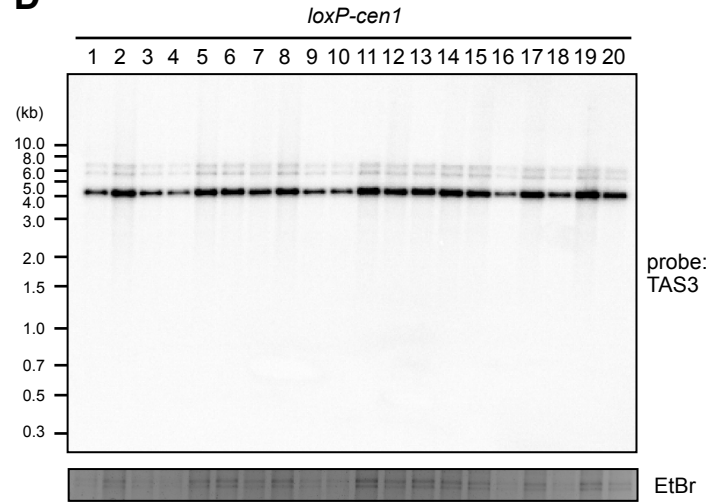

Supplementary Figure S7. The wild-type subtelomere DNA structure. (A) Schematic diagram of representative TAS2 hybridisation patterns in wild-type cells and the indicated fusion strains. The original data refer to (C) and Figure 3B. The identity of each band was deduced based on the disappearance of the common band(s) in assorted fusion survivors, as shown in the balloon. The *STE2* copy numbers are also indicated in parentheses. For rearrangements involving 3L, only NHEJ-type events were observed; therefore, the *STE2* copy number could not be deduced accurately from the TAS2 Southern blot. The identity of the 3L band was determined based on the elimination of the other identified bands. (B–D) Southern blot analyses of genomic DNAs recovered from 20 independent *loxP-cen1* strain isolates of various ages. The DNAs were digested with *NsiI* and then subjected to Southern blotting with the subtelomeric TAS1 (B), TAS2 (C), and TAS3 (D) probes. EtBr-stained images of the gels are shown as loading controls. Almost no structural variation was observed between the *loxP-cen1* isolates, with the exception of an additional TAS1 band in isolate #3.

**A**

|                            | <i>class</i>              | I                                       | II                                      | III                                     | IV                                      | V                                         |
|----------------------------|---------------------------|-----------------------------------------|-----------------------------------------|-----------------------------------------|-----------------------------------------|-------------------------------------------|
|                            | <i>PFGE-Southern blot</i> | tel(-)<br>TAS1(-)<br>TAS2(-)<br>TAS3(+) | tel(-)<br>TAS1(-)<br>TAS2(-)<br>TAS3(+) | tel(-)<br>TAS1(-)<br>TAS2(-)<br>TAS3(-) | tel(-)<br>TAS1(-)<br>TAS2(-)<br>TAS3(-) | tel(+/-)<br>TAS1(+)<br>TAS2(+)<br>TAS3(+) |
|                            | <i>gPCR</i>               | H1/H2/H3                                | H4/H5                                   | Asp                                     | -                                       | -                                         |
| Wild-type                  | 19                        | 6 (31.6)                                | 9 (47.3)                                | 1 (5.3)                                 | 0 (>5.0)                                | 3 (15.8)                                  |
| $\Delta lig4$              | 5                         | 2 (40.0)                                | 3 (60.0)                                | 0 (>16.6)                               | 0 (>16.6)                               | 0 (>16.6)                                 |
| $\Delta pku70$             | 18                        | 4 (22.2)                                | 14 (77.8)                               | 0 (>5.2)                                | 0 (>5.2)                                | 0 (>5.2)                                  |
| $\Delta taz1$              | 18                        | 6 (33.3)                                | 4 (22.2)                                | 0 (>5.2)                                | 0 (>5.2)                                | 8 (44.4)                                  |
| $\Delta swi10$             | 6                         | 3 (50.0)                                | 3 (50.0)                                | 0 (>14.2)                               | 0 (>14.2)                               | 0 (>14.2)                                 |
| $\Delta rad51$             | 19                        | 9 (47.4)                                | 10 (52.6)                               | 0 (>5.0)                                | 0 (>5.0)                                | 0 (>5.0)                                  |
| $\Delta rad55\Delta rad57$ | 18                        | 7 (38.9)                                | 9 (50.0)                                | 0 (>5.2)                                | 2 (11.1)                                | 0 (>5.2)                                  |
| $\Delta rad52$             | 13                        | 2 (15.4)                                | 2 (15.4)                                | 2 (15.4)                                | 7 (53.8)                                | 0 (>7.1)                                  |

**B**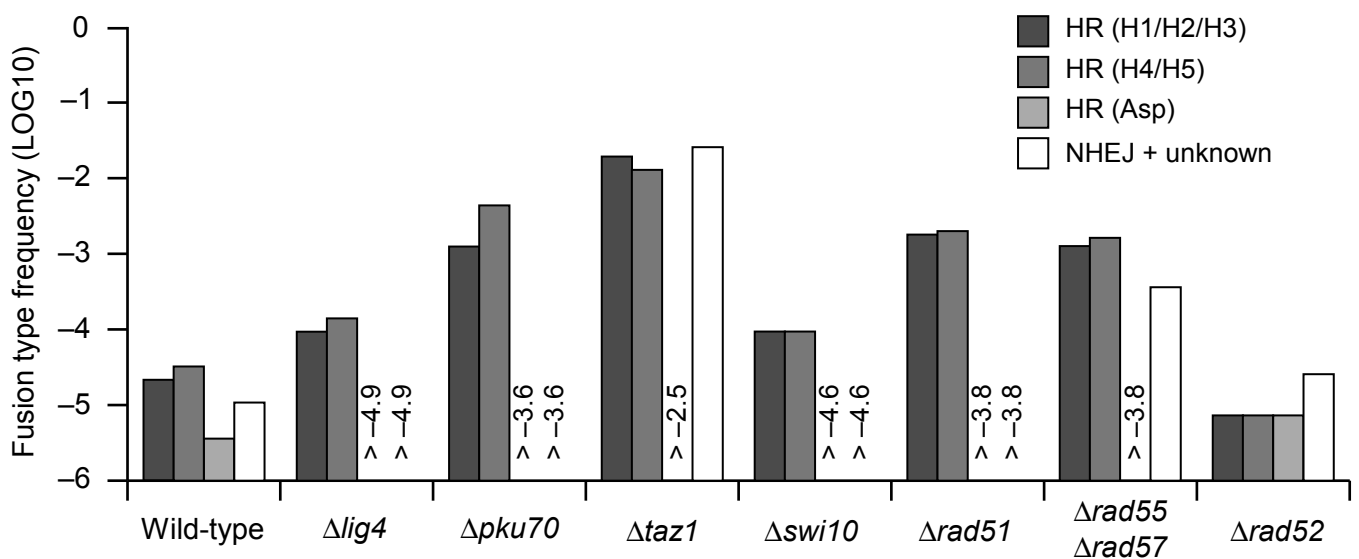

Supplementary Figure S8. Fusion spectrum analysis. (A) Classification of the  $\Delta cen1$ -f survivors in the indicated strain backgrounds. The five different types of classification (I–V) were based on the results of PFGE-Southern blot and gPCR analyses. The numbers in parentheses represent the percentage of each class of survivors in respective strains. Classes I–III are the HR-type and class V is the NHEJ-type; with the exception of those in the wild-type,  $\Delta rad51$ , and  $\Delta rad52$  backgrounds, the precise fusion points have not been determined. The identity of class IV remains unclear. (B) The calculated frequency of each fusion type in the indicated strain backgrounds. The calculations were based on the  $\Delta cen1$ -f survivor frequencies and fusion spectrum. The frequencies of classes IV and V were combined and are indicated as “NHEJ + unknown”.





Supplementary Figure S9. TAS2 instability occurs also in neocentromere survivors. (A) The predicted and experimentally determined STE2 copy numbers in the *loxP-cen1* clones, the telomere-fusion survivors, and the neocentromere survivors (shown as described in Figure 3D). Like the telomere-fusion survivors, TAS2 was also destabilised in the neocentromere survivors. (B) Scatter plot showing the differences between the predicted and experimentally determined STE2 copy numbers in the strains shown in (A). \*\* $P < 0.01$  by a Welch's two-tailed t-test.
